# Invadopodia enable cooperative invasion and metastasis of breast cancer cells

## Authors

L. Perrin,<sup>1</sup> E. Belova<sup>1</sup>, B. Bayarmagnai,<sup>1</sup> E. Tüzel,<sup>1</sup> B. Gligorijevic<sup>1,2\*</sup>

## Affiliations

<sup>1</sup>Bioengineering Department  
Temple University  
Philadelphia PA, USA.

<sup>2</sup>Cancer Signaling and Epigenetics Program  
Fox Chase Cancer Center  
Philadelphia PA, USA.

\*Corresponding author: [bojana.gligorijevic@temple.edu](mailto:bojana.gligorijevic@temple.edu)

## Abstract

Invasive and non-invasive cancer cells can invade together during the cooperative invasion. However, the events leading to it, role of EMT and the consequences this may have on metastasis are unknown. In this study, we demonstrate that the isogenic 4T1 and 67NR breast cancer cells sort from each other in 3D spheroids, followed by cooperative invasion. By time-lapse microscopy, we show that the invasive 4T1 cells move more persistently compared to non-invasive 67NR, sorting and accumulating at the spheroid-ECM interface, a process dependent on cell-ECM adhesions and independent from E-cadherin cell-cell adhesions. Elimination of invadopodia in 4T1 cells blocks invasion, demonstrating that invadopodia requirement is limited to leader cells. Importantly, we demonstrate that cells with and without invadopodia can also engage in cooperative metastasis in preclinical mouse models. Altogether, our results suggest that a small number of cells with invadopodia can drive the metastasis of heterogeneous cell clusters.

## 50 Introduction

51 More than 90% of cancer patients die due to complications resulting from metastasis, *i.e.*  
52 the process of dissemination, re-seeding and growth of cancer cells in secondary organs (1,  
53 2). In breast cancer, recent work demonstrated that metastases mostly arise from polyclonal  
54 seedings (3, 4). These polyclonal metastases develop from the collective dissemination of  
55 cell clusters, as opposed to the successive accumulation of multiple single clones. Together  
56 with the growing literature on phenotypic heterogeneity within primary tumors (5), these  
57 observations suggest that cooperativity between clones of cancer cells may facilitate  
58 metastasis.

59  
60 In breast cancer, the metastatic cascade is initiated when cancer cells acquire invasive  
61 properties, which includes the integration of motility and the ability to degrade the  
62 extracellular matrix (ECM) (2). Both invasion and motility are commonly associated with  
63 the activation of the epithelial-mesenchymal transition (EMT) program (6). During EMT,  
64 epithelial cells gradually lose cell-cell contacts, progressively strengthen their adhesions to  
65 the ECM and increase their contractility, becoming motile. Concomitantly to EMT, cancer  
66 cells can also acquire the capacity to locally degrade the ECM using invadopodia (7–10).  
67 Invadopodia are membrane protrusions enriched in matrix metalloproteinases (MMPs) that  
68 confer cancer cells with high proteolytic activity (11, 12) and importantly, elevated  
69 metastatic potential (13, 14). Since the EMT program is not a binary, nor a unidirectional  
70 switch, and since multiple EMT routes exist, distinct EMT trajectories may result in cancer  
71 clones with different levels of invasiveness (15).

72  
73 Recent 3D *in vitro* work on breast cancer showed that invasive collective strands are  
74 composed of cancer cells that differ in multiple invasive traits (3, 16–20). For example,  
75 compared to follower cells, leader cells show increased contractility (19), cell-ECM  
76 adhesion (3, 16), ECM remodeling (20) and ECM degradation capacities (18, 19). As a  
77 result, leader cells can enable the invasion of otherwise non-invasive follower cells, a  
78 phenomenon termed cooperative invasion (21). Our recent work showed that leader cells  
79 largely reside in the G1 phase of the cell cycle, the phase of the cell cycle during which  
80 invadopodia-mediated ECM degradation is the highest (22). These data suggest that during  
81 collective invasion, leader cells may preferentially assemble invadopodia. Although  
82 breakdown of the ECM is clearly required for collective invasion, the role of invadopodia-  
83 mediated ECM degradation in leader *vs.* follower cells is unclear. To this date, none of the  
84 studies detailed the spatial reorganization that may precede the cooperative invasion.  
85 Furthermore, as all the previous studies investigated cooperative invasion in 3D cultures,  
86 the cooperation during dissemination and metastasis were not yet explored.

87  
88 In this study, we aim to understand how cancer clones with differential invasive skills may  
89 cooperate during invasion and metastasis. We show that invasive clones can sort from and  
90 lead non-invasive clones into cooperative invasion and metastasis. Our study suggests that  
91 cooperativity between cancer cells may be an efficient mechanism for collective metastasis.

## 92 Results

### 93 **4T1 cells, but not 67NR cells, invade into collagen I**

94 To investigate how cancer clones with differential invasive skills cooperate during  
95 metastasis we used the isogenic pair of breast cancer cell lines 4T1 and 67NR, syngeneic to  
96 Balb/C mice (23, 24). Upon orthotopic implantation, both cell lines grow primary tumors,  
97 but only 4T1 cells metastasize (25). We assessed the invasive capacities of 4T1 and 67NR  
98 cells in the spheroid invasion assay in the high-density collagen I, which requires MMP-  
99

100 driven degradation of the matrix (22). After two days, we found that the 4T1 cells exhibited  
101 robust invasion into the collagen I matrix, while 67NR cells did not invade (Fig. 1A, B).  
102 Treatment with the pan-MMP inhibitor GM6001 effectively blocked invasion of 4T1 cells  
103 (Fig. 1A, B). In addition, immunofluorescence labeling of MMP-mediated collagen I  
104 cleavage sites (Col 3/4) showed that the invasion of 4T1 cells into the matrix was MMP-  
105 dependent (Fig. 1C). Treatment with mitomycin C, which impairs cell division (26),  
106 confirmed that the invasion of 4T1 cells was not due to cell proliferation (Fig. 1A, B and  
107 Fig. S1). 4T1 cells are known to invade as collective strands, with presence of E-cadherin  
108 at cell-cell junctions (27, 28). We confirmed that 4T1 cells expressed E-cadherin, while  
109 67NR cells expressed N-cadherin (Fig. S2A, B) (27–29). Both 4T1 and 67NR cell lines  
110 expressed vimentin (Fig. S2A). Interestingly, on the EMT axis (phenotypic continuum from  
111 epithelial to mesenchymal), this classifies the invasive 4T1 cells as epithelial/mesenchymal  
112 and the non-invasive 67NR cells as mesenchymal. Further, in the 4T1 spheroids, we found  
113 E-cadherin to be enriched at all cell-cell junctions, namely between leader and follower cells  
114 as well as between follower and follower cells. This verified that the integrity of E-cadherin-  
115 mediated cell-cell junctions was maintained during invasion (Fig. S2C, D) (30). Overall,  
116 these results demonstrated that 4T1 cells perform MMP-dependent collective invasion,  
117 while the 67NR cells do not invade into dense collagen I matrix.  
118

119 Invadopodia are membrane protrusions enriched in actin, actin-binding proteins, such as  
120 cortactin and Tks5, and MMPs (11, 12). As invadopodia function results in local ECM  
121 degradation, we hypothesized that invadopodia play a role in the invasion of 4T1 cells. We  
122 also reasoned that the observed difference in the invasion capacities of 4T1 vs. 67NR cells  
123 might be explained, at least in part, by a disparity in their invadopodia function. To test this,  
124 we first analyzed the expression level of key invadopodia components cortactin and Tks5  
125 (11). Both cell lines expressed similar levels of cortactin and Tks5 (Fig. 1D). We next  
126 measured invadopodia function by culturing cells on top of fluorescently labeled gelatin,  
127 which allows visualization of degradation as holes in the matrix (31). We found that 4T1  
128 cells, but not 67NR cells, were able to degrade the gelatin layer (Fig. 1E, F). Puncta of co-  
129 localized Tks5, F-actin and degraded gelatin, indicative of functional and mature  
130 invadopodia, were present in 4T1 cells (Fig. 1G). This suggests that the observed  
131 degradation holes were generated by invadopodia. Puncta of co-localized Tks5 and F-actin,  
132 indicative of invadopodia precursors, were present in both 4T1 and 67NR cells, at similar  
133 levels (Fig. S3A, B). Altogether, these results suggests that invadopodia precursor fail to  
134 mature in 67NR cells. To examine whether invadopodia also play a role in the invasion of  
135 4T1 cells in spheroids, we labeled spheroids for F-actin, Tks5 and MMP-mediated collagen  
136 I cleavage sites. We identified functional invadopodia in leader cells, demonstrated by co-  
137 localization of F-actin, Tks5 and MMP-mediated collagen I cleavage sites (Fig. 1H). These  
138 observations established a link between invadopodia and collective invasion of 4T1 cells  
139 and suggest that leader cells assemble invadopodia.  
140

141 Since the invasion phenotype consists of invadopodia-mediated ECM degradation and cell  
142 migration (32), we performed a scratch assay to investigate whether 67NR cells can migrate  
143 as efficiently as 4T1 cells. We tracked individual cells (Fig. 1I, J and Movie S1) and found  
144 that while the instantaneous speed of 67NR cells is higher than that of 4T1 cells (Fig. 1K),  
145 4T1 cells are significantly more persistent than 67NR cells (Fig. 1L).  
146

147 In summary, we showed that the 4T1/67NR pair is a suitable tool to investigate how cancer  
148 clones with differential invasive capacities cooperate during invasion.  
149

## Persistence drives cell sorting between 4T1 and 67NR cells

We next set out to investigate dynamics of spatial organization and invasion in the spheroids where 4T1 and 67NR are mixed together. We generated 4T1-mScarlet and 67NR-GFP cell lines and mixed them at a 1:50 ratio, to account for the higher proliferation rate of 4T1 over the course of the spheroid invasion assay (Fig. S4A, B). We next embedded the mixed spheroids in collagen I, and performed daily longitudinal imaging (Fig. 2A and Fig. S4C) (33). We noticed that 67NR and 4T1 cells sorted from each other starting on day 3. Individual optical slices (Movie S2) and the analysis of cell coordinates clearly demonstrated the enrichment of 4T1 cells at the edge of spheroids (Fig. 2B and Fig. S4D). To quantify cell sorting, we calculated the relative distance of each cell to the spheroid center, a metric we named *Distance Index* (DI), such that a value of 0 marks a cell at the spheroid center and a value of 1 corresponds to a cell at the spheroid-collagen I interface (Fig. 2C). At day 3 post-embedding, we found that the DI of 4T1 cells increased over time and was significantly higher than the DI of 67NR cells (Fig. 2D). This trend was also present in individual spheroids (Fig. S4E). These data revealed that, over the course of 3 days, cells reorganized from a random distribution to spheroids with 4T1 cells populating the interface and 67NR cells located in the spheroid core. On days 4-6, cell sorting of 4T1 and 67NR cells was followed by the invasion (Fig. S4F).

Spheroids of 4T1 cells have been shown to contain laminin, collagen I and fibronectin in the extracellular space (34). The presence of ECM within a spheroid suggests that 3D cell motility, and consequently cell sorting, may require MMPs. To test the link between motility, MMPs and cell sorting, we treated spheroids with an inhibitor of cell contractility (ROCK inhibitor, Y-27632) or a pan-MMP inhibitor, GM6001. We found that both treatments blocked cell sorting (Fig. 2E, F). We then performed time-lapse imaging of mixed spheroids. We tracked individual cells within the spheroid (Fig. 2H and Movies S3, 4) and for each cell, calculated the difference between the initial and final distance indices ( $\Delta DI = DI$  for the last position of a given cell –  $DI$  for the initial position of a given cell), such that a positive  $\Delta DI$  indicates cell motility towards the spheroid edge (“out” in Fig. 2G, I), and a negative  $\Delta DI$  indicates movement towards the spheroid center (“in” in Fig. 2G, I). A null  $\Delta DI$  indicates no net movement. We once again classified each cell based on their initial position as *edge* or *core*, and defined the edge compartment as a two-cell layer closest to the spheroid-collagen interface (30  $\mu\text{m}$ -wide elliptical ring; Fig. 2G). We found that the percentage of tracked cells that switched between compartments during the duration of the time-lapse imaging was negligible for all cells, except for the 4T1 cells initially located in the core (Fig. S5A). For 4T1 cells, we found that the  $\Delta DI$  was significantly higher for cells whose initial position was in the spheroid core compared to cells whose initial position was at the spheroid edge (Fig. 2H, I). This indicates that 4T1 cells moved from the spheroid core towards the spheroid edge. In contrast, 4T1 cells located at the spheroid edge had a  $\Delta DI$  close to zero, suggesting that 4T1 cells that initially found at the spheroid edge moved within that compartment only (Fig. 2I). The  $\Delta DI$ s were minimal for all 67NR cells, regardless of their initial position, indicating that these cells moved only within the compartments in which they were initially located (Fig. 2I). Since the  $\Delta DI$  compares the initial and the final positions of cells, this metric does not provide information on the persistence of cells. Indeed, for a given  $\Delta DI$ , the cell trajectory may be more or less tortuous. By computing the mean square displacement (MSD) of cells in the polar coordinate system, which captures spheroid symmetry, we determined that 4T1 cells are more persistent in the radial direction (super-diffusive,  $\alpha > 1$ ) than 67NR cells (diffusive,  $\alpha = 1$ ) (Fig. 2J, K and Fig. S5B-D). Both 4T1 and 67NR cells had similar motility behavior in the angular direction (Fig. 2J and Fig. S5B, C). Treatment of spheroids with GM6001 impaired the movement of 4T1 cells from

200 the core to the edge (Fig. 2I-K, Movies S5, 6), and resulted in a reduced effective diffusion  
201 coefficient of all cells in the radial direction (Fig. 2J, K; Fig. S5B-D). We confirmed that  
202 the spheroid growth was similar in the GM6001 and DMSO conditions, suggesting that the  
203 loss of cell sorting was independent from cell proliferation (Fig. S5E). Taken together, these  
204 results indicate that cell sorting within mixed spheroids is driven primarily by the directed  
205 motility of 4T1 cells from the core to the edge compartment and their ability to remain at  
206 the edge, while 67NR cells exhibit random (diffusive) motility, remaining in the same  
207 compartment over time. In summary, we showed that differences in persistence drive cell  
208 sorting between 4T1 and 67NR cells.

### 209 **Cell sorting is E-cadherin independent**

210 While self-organization and patterning of cells is heavily studied in embryonic tissues and  
211 during development, so far, only a few studies tested mixtures of two or more cell types in  
212 the cancer spheroid model (19, 20). Most studies reported that cells sort based on the  
213 *differential adhesion hypothesis*, which predicts sorting based on differences in the  
214 intercellular adhesiveness, with cells that exhibit the strongest cell-cell adhesions positioned  
215 in the center (35). Based on the expression of cadherins for the 4T1/67NR pair, the  
216 differential adhesion hypothesis predicts that in a 3D spheroid, E-cadherin-expressing 4T1  
217 will sort from N-cadherin-expressing 67NR cells, with 4T1 cells located in the center and  
218 67NR cells surrounding them. In contrast, our data demonstrates the opposite pattern (Fig.  
219 2A, B), suggesting that the differential adhesion hypothesis may not apply in our model. To  
220 confirm this, we inhibited cell-cell junctions in 4T1 cells via E-cadherin blocking antibody  
221 (Fig. 3A). Interestingly, blocking E-cadherin did not eliminate cell sorting between 4T1 and  
222 67NR cells, but delayed it by 1 day (Fig. 3B). To confirm this result, we generated stable  
223 E-cadherin knock down cell lines (Ecad-KD1 and Ecad-KD2; Fig. 3C-E). According to  
224 Western blot analysis, decrease in E-cadherin expression was 36.3% for Ecad-KD1 and  
225 96.8% for Ecad-KD2. Both Ecad-KD cell lines sorted out from the 67NR-GFP cells, and  
226 accumulated to the spheroid edge by day 3 post-embedding (Fig. 3G, H). Overall, this  
227 suggests that, in our model, cell sorting is independent from E-cadherin.

### 228 **An adhesive ECM interface is required for cell sorting**

229 Since cell sorting occurred by day 3 post-embedding (Fig. 2A, D), and the accumulation of  
230 4T1 cells at the spheroid edge was maintained throughout 3D invasion (Fig. 2I), we  
231 reasoned that the interaction of 4T1 cells with the ECM may be critical for maintaining cell  
232 sorting. To test this, we placed mixed spheroids in a non-adherent matrix composed of  
233 agarose. At day 3 and 4, the DI was similar for both 4T1 cells and 67NR cells, demonstrating  
234 that cells embedded in agarose did not sort (Fig. 4A, B). The area of spheroid core was  
235 similar in both collagen I and agarose matrices, indicating that the loss of cell sorting was  
236 independent from cell proliferation (Fig. S6A). This absence of cell sorting could be due to  
237 the failure of 4T1 cells to remain at the spheroid edge without the adhesive ECM. To test  
238 this in real-time, we performed time-lapse imaging of mixed spheroids embedded in agarose  
239 and tracked individual 4T1 cells (Fig. 4C; Movie S7). We found that the average  $\Delta$ DI for  
240 cells initially located at the edge compartment was negative, and close to zero for cells  
241 initially located in the core compartment (Fig. 4D). This indicates that 4T1 cells move from  
242 the spheroid edge compartment into the core compartment (Movie S8), and within the core  
243 (Movie S7). Those 4T1 cells, that enter the edge compartment, subsequently leave it, which  
244 was not observed in spheroids embedded in collagen I matrix (Movie S9). Interestingly, by  
245 computing the MSD of cells in the radial direction, we found that the difference in  
246 persistence between 4T1 (super-diffusive,  $\alpha > 1$ ) and 67NR (diffusive,  $\alpha = 1$ ) cells was  
247  
248

249 maintained (Fig. 4E and Fig. S6B-D), suggesting that an adhesive ECM interface is required  
250 for cell sorting.

251 This prompted us to hypothesize that, compared to 67NR cells, 4T1 cells preferentially  
252 adhere to the ECM. To compare the adhesive properties of 4T1 and 67NR cells to ECM, we  
253 developed a 2D cell-ECM adhesive competition assay, in which both cell types were plated  
254 on top of circular gelatin islands (5.5 mm in diameter), with poly-L-lysine coating present  
255 between the islands (Fig. 4F). After 24 h, we scored the number of 4T1 and 67NR cells that  
256 migrated from the gelatin islands onto the poly-L-lysine coated region. We found that 85%  
257 of the cells present on the poly-L-lysine region at 24 h timepoint were 67NR cells (Fig. 4G).  
258 To explain this, we analyzed the time-lapse movies, and saw that in the rare event of 4T1  
259 cells crossing from the gelatin onto the poly-L-lysine area, cell ended up migrating back to  
260 the gelatin (Movie S10). We wondered whether this could be explained by 4T1 cells having  
261 a higher adhesion strength to gelatin than 67NR cells. To test this, we measured the contact  
262 angle of cells plated on gelatin or poly-L-lysine (Fig. 4H). The cell-matrix contact angle  
263 was previously shown to increase with the adhesion strength (36). We found that both cell  
264 types had similar contact angle when plated on gelatin (Fig. 4I). However, 4T1 cells plated  
265 on poly-L-lysine had a significantly lower contact angle, while 67NR cells exhibited similar  
266 contact angle values on both gelatin and poly-L-lysine (Fig. 4I), indicating that, compared  
267 to 67NR cells, 4T1 cells are more sensitive to the presence of ECM. This affinity to ECM  
268 is in line with the higher levels of both FAK and p-FAK observed in 4T1 cells than in 67NR  
269 cells (Fig. S6E). By analyzing cell-cell contacts between 4T1 and 67NR cells plated on  
270 gelatin, we found that the percentage of homotypic contacts was similar at the time of  
271 plating (0 h) and at 24 h post plating (Fig. S6F, G). This confirmed that 4T1 and 67NR cells  
272 did not sort in 2D, confirming once more that differential adhesions between cells are not  
273 the main driver for cell sorting in our system, and emphasizing the requirement for a cell-  
274 ECM interface to initiate cell sorting (35).

#### 275 **4T1 cells lead 67NR cells in an MMP- and E-cadherin-dependent cooperative invasion**

276 Following sorting of 4T1 and 67NR cells in spheroids at day 3 and 4, invasion occurred at  
277 day 5 and 6 (Fig. 2A and Fig. 5A; Fig. S4C). One mechanism by which cancer cells can  
278 invade collectively is cooperative invasion: invasive leader cells create microtracks inside  
279 the ECM, through which non-invasive cells can follow (18–21). Since 4T1 and 67NR cells  
280 display differential invasive skills, we reasoned that 4T1 cells could enable the cooperative  
281 invasion of the non-invasive 67NR cells. To test this hypothesis, we analyzed the mixed  
282 spheroids at day 6 post embedding. We observed that the non-invasive 67NR cells present  
283 in the mixed spheroids entered the collagen I matrix (Fig. 5A). Accordingly, we found that,  
284 compared to 67NR-only spheroids, mixed spheroids had a higher number of strands per  
285 spheroid (Fig. 5B), and approximately one third of the strands contained 67NR cells (Fig.  
286 5C). Importantly, in mixed spheroids, the majority of strands was led by 4T1 cells (Fig. 5D),  
287 which assemble invadopodia (Fig. 1H). In line with the MMP-dependency of 4T1 cells for  
288 invasion (Fig. 1A), GM6001 blocked the mixed spheroid invasion (Fig. 4A-C). During  
289 cooperative invasion, cell sorting between 4T1 and 67NR cells was maintained in the  
290 invasive strands as well as within the spheroid (Fig. 5E-G), with the 4T1 cells lining the  
291 spheroid-matrix interface. Overall, these findings demonstrate that cooperative invasion of  
292 mixed spheroids into collagen I is MMP-dependent, with 4T1 cells assuming the leader  
293 position.  
294

295  
296 Our results so far suggest that the 4T1-mediated ECM degradation is required for 67NR  
297 cells to enter the collagen I matrix. We hypothesized that 4T1 cells presence in the collagen  
298 I matrix is necessary and sufficient to degrade the collagen and create microtracks. To

299 confirm this, instead of pre-mixing 4T1 cells with 67NR cells in a spheroid, we embedded  
300 67NR spheroids in collagen I matrix populated by 4T1 cells. Similar to our observations in  
301 mixed spheroids, we found that in the presence of 4T1 cells in the collagen I matrix, 67NR  
302 cells invaded into the matrix, and that this invasion was MMP-dependent (Fig. S7A, B). To  
303 exclude the possibility that soluble MMPs released by 4T1 cells facilitated the invasion of  
304 67NR cells into the collagen I matrix, we cultured spheroids of 67NR cells with conditioned  
305 medium from 4T1 cells. We found that providing conditioned medium from 4T1 cells to  
306 67NR cells was not sufficient for 67NR cells to invade into the collagen I matrix (Fig. S7C,  
307 D). In mixed spheroids, we identified microtracks inside the collagen I matrix, filled with  
308 4T1 cells leading and 67NR cells following (Fig. S7E). Previous report of a heterotypic  
309 cooperative invasion between cancer-associated fibroblasts and epithelial cancer cells has  
310 demonstrated involvement of heterotypic N-cadherin/E-cadherin adhesions (37). We did  
311 not detect heterotypic E-cadherin/N-cadherin junctions between 4T1 and 67NR cells (Fig.  
312 S8A-C), suggesting that the cooperative invasion between these cells was not dependent on  
313 E- /N-cadherin interactions. Overall, our data suggest that 4T1 cells degrade the collagen I  
314 matrix and 67NR cells move into the microtracks created by 4T1 cells.  
315

316 We wondered if the inhibition of E-cadherin, which had no effect on cell sorting (Fig. 3F,  
317 G), can affect cooperative invasion. To test this, we imaged 4T1, Ecad-CTL, -KD1 and -  
318 KD2 spheroids on day 6, when invasion occurs (Fig. 5H). While the Ecad-KD1 cell line  
319 showed a partial transition from collective to single-cell invasion, with invasive strands as  
320 well as single invasive cells, a complete transition to single cell invasion was observed for  
321 Ecad-KD2. Similarly, in the mixed spheroids containing 67NR cells with either Ecad-CTL  
322 or -KDs, while Ecad-CTL and Ecad-KD1 cells formed invasive strands, both Ecad-KD cell  
323 lines exhibited single cell invasion (Fig. 5I-K). To quantify occurrences of cooperative  
324 invasion in both collective and single cell modes of invasion, we measured the number of  
325 67NR followers present either in strands (Fig. 5J), or as single cells (Fig. 5K). Our results  
326 demonstrate that while 67NR can follow Ecad-KD1 cells, which maintain invasive strands  
327 (Fig. 5I), in the presence of complete transition to single cell invasion, such as in mixed  
328 spheroids of Ecad-KD2 and 67NR, cooperative invasion is lost (Fig. 5K).  
329

### 330 **Cells with invadopodia lead cells without invadopodia in cooperative invasion**

331 Given that 4T1-mediated ECM degradation is required for cooperative invasion (Fig. 4; Fig.  
332 S6), and that 4T1 leader cell assemble invadopodia (Fig. 1H), we wondered whether  
333 specifically invadopodia assembly by 4T1 cells was responsible for ECM degradation. To  
334 rigorously confirm that invadopodia function is required for cooperative invasion of cancer  
335 cells, we stably eliminated invadopodia in 4T1-mScarlet cells, using a knockdown of mouse  
336 Tks5 (Tks5-KD) (13), and established the corresponding control (Tks5-CTL) cell line (Fig.  
337 6A, top, 78.1% knockdown efficiency). We also verified that Tks5-CTL and Tks5-KD cell  
338 lines still expressed E-cadherin (Fig. 6A, bottom), which was localized at the junctions  
339 between Tks5-CTL and Tks5-KD cells in spheroids (Fig. S9A, B). We confirmed by gelatin  
340 degradation assay in 2D and spheroid invasion assay in 3D that Tks5-KD cells lost their  
341 invasive capacity (Fig. 6B-E). We then performed the spheroid invasion assay of mixed  
342 spheroid containing Tks5-CTL and Tks5-KD cells. At day 2 post-embedding, we found that  
343 both Tks5-CTL cells and the non-invasive Tks5-KD cells had entered the collagen I matrix  
344 (Fig. 6D). Mixed spheroids had a similar number of strands to Tks5-CTL (Fig. 6E), and  
345 most strands contained both cell types (Fig. 6F) and were led by Tks5-CTL cells (Fig. 6G).  
346 To test if cooperative invasion was cell type specific, we chose the metastatic human cell  
347 line MDA-MB-231, which does not express E-cadherin and assembles functional  
348 invadopodia (13). By knocking down human Tks5 in MDA-MB-231 cells (Fig. S10A-C),

349 we observed that cells without invadopodia were able to follow cells with invadopodia, via  
350 cooperative invasion (Fig. S10D-G), strengthening our results. To further test the  
351 importance of invadopodia in cooperative invasion of cancer cells, we generated mixed  
352 Tks5-KD and 67NR-GFP spheroids. Here, we did not observe invasive strands (Fig. 6H, I).  
353 Finally, we validated the conclusion with a different Tks5 shRNA sequence, Tks5-KD2,  
354 which provided results similar to Tks5-KD (Fig. S11). Overall, we demonstrate that  
355 functional invadopodia are required in leader cells during cooperative invasion, while  
356 follower cells can lack invadopodia.

357  
358 We also tested if the removal of invadopodia affected cell sorting. As expected, cell sorting  
359 did not occur in mixed spheroids of Tks5-CTL and Tks5-KD cells (Fig. S12A), but it did  
360 occur in spheroids containing Tks5-KD and 67NR-GFP cells (Fig. S12B). These findings  
361 confirmed that invadopodia are not required for cell sorting. Since Tks5-CTL and Tks5-KD  
362 cells display similar motility and cell-ECM adhesion properties (Fig. S12C, D), these  
363 observations also strengthen the requirement for differential motility and differential cell-  
364 ECM sensitivity for cell sorting to occur. In accordance with this, cell sorting did not occur  
365 in spheroids containing 4T1-mScarlet and 4T1 wild type cells (Fig. S12E, F).

### 367 **Mixtures of cells with invadopodia and without invadopodia perform cooperative** 368 **metastasis**

369 Dissemination and metastasis require transendothelial migration of cancer cells, i.e.  
370 intravasation and extravasation, which were previously shown to be invadopodia-dependent  
371 (13, 38). While interstitial ECM in the primary tumor and surrounding tissues may be  
372 permanently remodeled by microtracks formation (39), transendothelial migration involves  
373 brief, transient opening of perivascular ECM (40). It is not known whether invasive and  
374 non-invasive cells may also cooperate during metastasis. To investigate whether cells with  
375 invadopodia could enable metastasis of cells without invadopodia, we generated tumors  
376 with single or mixed cell lines. After tumors reached 6-9 mm in diameter, we performed the  
377 lung clonogenic assay on digested tissues. To determine which cell type was growing  
378 metastatic lung colonies, we leveraged the differences in fluorescent protein expression or  
379 drug sensitivity. We confirmed that the Tks5 knock down was maintained in the Tks5-KD  
380 tumors (Fig. S11I). We found that the Tks5-KD cell lines, in 4T1 or MDA-MB-231  
381 background, and 67NR cells were not capable of lung metastasis, in contrast to control and  
382 wild type cells (Fig. 6K, Fig. S10I, Fig. S11J). When 4T1 and 67NR cells were co-injected,  
383 67NR did not metastasize (Fig. 6L). This was not due to 4T1 cells taking over as 67NR cells  
384 were present in the tumor tissue (Fig. 6J). Similarly, the co-injection of MDA-MB-231  
385 control and its corresponding Tks5 knockdown, D2-KD, demonstrated that only control  
386 cells were capable of metastasis (Fig. S10H, I). Interestingly, when Tks5-KD were co-  
387 injected with Tks5-CTL cells, both cell types were observed in the lungs (Fig. 6L),  
388 suggesting that cooperative metastasis has occurred. Collectively, these results imply the  
389 dependence of cooperative metastasis on invadopodia and on E-cadherin expression and/or  
390 presence of cell-cell junctions.

### 391 **Discussion**

392  
393 In this study, we show that invasive cells can sort from, and lead non-invasive cells during  
394 cooperative invasion and metastasis. By examining cell movements in spheroids, we  
395 demonstrate that differential persistence and ECM sensitivity drive cell sorting between  
396 clones. Through invadopodia removal, by silencing Tks5, we demonstrate that cells with  
397 invadopodia lead cells without invadopodia in cooperative invasion, and enable their  
398 metastasis.



399 We confirm previously reported observations that the invasive 4T1 cells are in a hybrid  
400 epithelial/mesenchymal state, while the non-invasive 67NR cells are mesenchymal (27–29).  
401 It was previously shown that the expression of Twist, which is necessary for invadopodia  
402 (8), is present in 4T1 cells but not in 67NR cells (41). Hence, Twist-mediated EMT could  
403 be responsible for the differences in invasion skills between 4T1 and 67NR cells (41). Since  
404 4T1 cells but not 67NR cells assemble functional invadopodia, it seems that specific  
405 invadopodia-granting EMT trajectory, rather than EMT completion is required for  
406 invadopodia emergence. Our results are in line with the recent evidence that epithelial cells  
407 (3, 42) and hybrid epithelial/mesenchymal cells can metastasize, sometimes more efficiently  
408 than mesenchymal cells (43, 44).

409 Despite expressing the core invadopodia components cortactin and Tks5, 67NR cells fail to  
410 degrade the matrix. However, 67NR cells lack active MMP-2 and MMP-9, likely due to  
411 MMP-14 (also known as MT1-MMP), protease commonly in charge of activating MMP-2  
412 and MMP-9, is not being functional, or not being delivered to the plasma membrane (45,  
413 46).

414 For the first time here, we uncover the role of differential persistence and cell-ECM  
415 sensitivity in establishment of cell sorting in cancer. Classical studies on cell sorting during  
416 development showed cell sorting commonly relies on differential strength of cell-cell  
417 adhesions (35), or on differences in contractility (47). In contradiction to these views, we  
418 show that 4T1 and 67NR cells did not sort on a 2D gelatin layer, or when placed in a 3D  
419 agarose matrix. The importance of differential motility in sorting was previously suggested  
420 during tissue patterning (48), and in engineered breast tubules, where it was shown that  
421 more directional epithelial cells accumulate at the tissue edge (49). During self-organization  
422 of mammary ducts, presence of binary cell-ECM interactions (on or off) was reported to  
423 regulate cell sorting (36). Similar to our observations, Pawlizak *et al.* recently demonstrated  
424 that sorting of breast cell lines expressing E-, N- or P-cadherin could not be explained by  
425 the differential adhesion hypothesis (50). Interestingly, the authors proposed that motility  
426 could be responsible for cell sorting.

427 We find that in the spheroids where highly-persistent, invasive cells sensitive to ECM are  
428 mixed with non-invasive, randomly moving cells, sorting and accumulation of invasive cells  
429 at the spheroid-ECM interface precedes cooperative invasion. This emphasizes the  
430 importance of studying the mechanisms regulating the spatial organization of leader and  
431 follower cells. The accumulation of leader cells at the spheroid-matrix interface may  
432 enhance the speed and efficiency of the cooperative invasion. Supporting these views, a  
433 recent study demonstrated that cell sorting precedes the basal extrusion of mammary  
434 epithelial cells (51). Importantly, while cell sorting may be catalytic, it does not seem to be  
435 essential for the cooperative metastasis in our system. While mixed 4T1 Tks5-KD and Tks5-  
436 CTL cells engage in cooperative metastasis, but do not sort, mixes of 4T1 and 67NR cells  
437 sort but do not metastasize cooperatively.

438 Since the discovery of cooperative invasion, significant work has been carried out to  
439 uncover the mechanisms by which heterogeneous breast cancer cell populations interact and  
440 mobilize collectively. Our work suggests that invadopodia activity is a determinant of the  
441 leader cell phenotype. We previously showed that the G1 phase of the cell cycle is also a  
442 determinant of the leader cell identity (22). Consistent with this present work, we had also  
443 proved that invadopodia are enriched in the G1 phase of the cell cycle (22). A different  
444 study revealed that cells leading invasion strands possess higher intracellular energy  
445 compared to follower cells (17). Altogether, it seems that the cell cycle, intracellular energy  
446 and invadopodia function are determinants of the leader cell identity. However, the interplay  
447 between the cell cycle, intracellular energy and invadopodia function has yet to be

448 investigated in the context of the emergence of leaders and followers within a cell  
449 population.

450 In summary, our study suggests that cooperativity between cancer clones may be an efficient  
451 mechanism for collective metastasis. Specifically, we demonstrate that invadopodia enable  
452 cooperative metastasis and allow non-invasive cells to metastasize. Our findings on  
453 cooperative metastasis of 4T1 Tks5-KD with Tks5-CTL are in alignment with the previous  
454 demonstration of dissemination of epithelial cell clusters (3). In contrast, 67NR cells do not  
455 cooperatively metastasize when mixed with 4T1. In addition, MDA-MB-231 Tks5-KD (D2-  
456 KD) cells do not cooperatively metastasize with MDA-MB-231 cells. Both of these cell  
457 lines lack E-cadherin, suggesting that the cooperative metastasis is dependent on strong E-  
458 cadherin-based cell-cell interactions. Interestingly, cooperative invasion in 3D spheroid  
459 assay does not pose such a requirement, as both 67NR and D2-KD cells successfully follow  
460 their invasive counterparts. The likely reason is that the collagen deformations generated by  
461 the invasive leader cells are plastic (permanent), allowing either cell strands or individual  
462 cells to migrate through them (39). In contrast, deformations that leader cells generate to the  
463 blood vessel wall are elastic (transient), and followers can cross blood vessel walls only if  
464 they exhibit strong cell-cell adhesions to the leader.

465 Our work constitutes one of the first evidences for cooperative metastasis, which may be  
466 more detrimental than metastasis of single cells. We propose that targeting invadopodia  
467 could be a potent strategy to inhibit metastasis of both individually (13, 14), as well as  
468 collectively invading cells.

## 469 **Materials and Methods**

### 471 **Ethics statement**

472 All experiments on mice (*Mus musculus*) were conducted in accordance with the NIH  
473 regulations and approved by the Temple University IACUC protocol number 4766.

### 474 **Fabrication of the spheroid imaging devices (SIDs)**

475 Spheroid imaging devices (SIDs) were fabricated as previously described (33). Briefly,  
476 SIDs were made by binding poly-dimethyl-siloxane (PDMS) disks to the glass-bottom  
477 dishes (MatTek Corporation). Each PDMS disk measures 17.5 mm in diameter and contains  
478 three wells, 5.5 mm in diameter, suited for individual spheroids.

### 481 **Gelatin coating of 6-well plates**

482 6-well plates were coated with gelatin as previously described (52). Briefly, each well was  
483 coated with a 2.5% gelatin solution for 10 min followed by treatment with 0.5%  
484 glutaraldehyde (Sigma-Aldrich) for 10 min, on ice, and an extra 30 min at room  
485 temperature. Plates were sterilized by 70% ethanol and then 50 U/mL penicillin - 50 µg/mL  
486 streptomycin treatment.

### 488 **Cell culture**

489 The isogenic murine breast cancer cell lines 4T1 and 67NR were gifts from Dr. Fred R.  
490 Miller at the Karmanos Cancer Center and Dr. Jin Yang from UCSD. The human breast  
491 cancer cell line MDA-MB-231 (HTB-26) was obtained from the American Type Culture  
492 Collection. The MDA-MB-231-Dendra2-hTks5 KD cell line was described previously and  
493 was kept under continuous 0.5 µg/ml puromycin and 500 µg/ml geneticin pressure (13). All  
494 cells were cultured in Dulbecco's modified eagle medium [4.5 g/L D-glucose, L-glutamine]  
495 (DMEM, Gibco), supplemented with 10% fetal bovine serum (FBS, Atlanta Biologicals)  
496

497 and 50 U/mL penicillin - 50 µg/mL streptomycin (Gibco). Cell cultures were maintained at  
498 37 °C and 5% CO<sub>2</sub> for a maximum of 60 days.

### 499 **Plasmid transfections**

500 The 4T1-mScarlet and 67NR-GFP cell lines were generated by transfection using a 1:4 ratio  
501 of plasmid DNA:FugeneHD reagent (Promega), according to the manufacturer's  
502 instructions, followed by selection with 500 µg/mL geneticin (Fisher BioReagents) and 3  
503 µg/mL puromycin (MP Biomedicals), respectively. pmScarlet-H-C1 was a gift from Dorus  
504 Gadella (Addgene plasmid # 85043). pEGFP-puro was a gift from Michael McVoy  
505 (Addgene plasmid # 45561). The MDA-MB-231-mScarlet cell line was generated by  
506 electroporation (Lonza) of the pmScarlet-C1 plasmid, according to the manufacturer's  
507 instructions, and selection with 500 µg/ml geneticin. After two weeks of drug selection,  
508 cells were sorted (BD FACSAriaIIµ, BD Biosciences), collecting the subpopulations  
509 expressing high levels of mScarlet or GFP.  
510

### 511 **Lentivirus transduction and testing KD efficiencies**

512 The knockdown cell lines Tks5-KD and -KD2, E-cadherin-KD1 and -KD2, and the  
513 knockdown control cell lines Tks5-CTL, Ecad-CTL and MDA-MB-231-mScarlet-CTL  
514 were generated by transduction of the 4T1-mScarlet, 4T1 and MDA-MB-231-mScarlet cell  
515 lines, respectively, with lentiviral particles (3 viral particles/cell) containing shRNA  
516 targeting mTks5 (Clone ID: TRCN0000105733, CGTGGTGGTGTCCAATACTATAA;  
517 Clone ID: TRCN0000105734, CCTCATACATTGACAAGCGCA), hTks5 described  
518 previously (13), or E-cadherin (KD) (Clone ID: TRCN0000042581,  
519 CCGAGAGAGTTACCCTACATA; Clone ID: TRCN0000042579,  
520 CGGGACAATGTGTATTACTAT) or non-targeting shRNA (CTL) in the pLKO.1-puro  
521 vector (MISSION library, Sigma-Aldrich), and selection with 2 µg/mL puromycin 3-7 days  
522 after infection. Western blots were analyzed to confirm KD efficiencies. In addition, images  
523 of Ecad-CTL and Ecad-KDs immunolabeled with E-cadherin and segmented using  
524 Cellpose. Masks were overlaid on the image and integral density per cell was quantified.  
525

### 526 **2D proliferation assay**

527 Crystal violet staining was used to assess the effect of mitomycin C on the proliferation of  
528 the 4T1 cell line. Briefly, 4T1 cells were seeded in a 6-well plate and the next day, the  
529 culture medium was replaced with culture medium containing 0.5 µg/mL Mitomycin C  
530 (resuspended in DMSO, Cayman Chemical). After 2 days, cells were washed with cold  
531 PBS, fixed with ice-cold 100% methanol for 10 min and stained with 0.5% crystal violet  
532 solution in 25% methanol for 10 min at room temperature. Excess dye was removed by  
533 several washes with tap water and the plate was air dried overnight at room temperature.  
534 The dye was solubilized using 100% methanol for 20 min and the optical density was read  
535 on a plate reader at 570 nm. The optical density at 570 nm for mitomycin C-treated cells  
536 was reported to the optical density at 570 nm for DMSO-treated cells.  
537

### 538 **2D gelatin degradation assay**

539 Gelatin was fluorescently labeled with Alexa-405-NHS ester and 35 mm glass bottom  
540 dishes (MatTek Corporation) were coated with Alexa-405-gelatin as previously described  
541 (31). 400,000 (4T1/67NR) or 300,000 (MDA-MB-231) cells were plated per dish and cells  
542 were fixed 18 h later with 4% paraformaldehyde (Alfa Aesar) for 10 min, permeabilized  
543 with 0.1% Triton X-100 (Calbiochem) for 5 min, blocked with 1% FBS/1% BSA (Sigma-  
544 Aldrich) in PBS (Gibco) for 3 h, incubated with anti Tks5 antibody (Millipore, MABT336)  
545 for 2 h, then with secondary antibody and Alexa Fluor 633 Phalloidin (Invitrogen) for 1 h.  
546

547 Samples were imaged on a laser scanning confocal microscope (FV1200, Olympus)  
548 using a 60X objective (UPLSAPO60XS, 1.35 NA, Olympus). Stacks were collected at 1  
549  $\mu\text{m}$  z-step. To quantify matrix degradation, images were processed using a custom macro  
550 in Fiji. Briefly, slices from the stack were z-projected using the *Max Intensity* method,  
551 followed by thresholding of the signal in the gelatin channel, using the *Automatic Threshold*  
552 algorithm, and measuring the area of degradation spots using the *Particle Analysis* tool. To  
553 account for the differences in the cell density across fields of view, the total area of  
554 degradation in a field of view was divided by the total number of cell present in this field of  
555 view. Cells were counted using the F-actin staining.

### 556 **Scratch assay**

557 6-well plates were coated with 50  $\mu\text{g/ml}$  poly-L-lysine (Sigma-Aldrich) for 20 min and air-  
558 dried. Cells were plated and cultured to confluency before a 10  $\mu\text{l}$  pipet tip was used to  
559 create a cross-shaped wound across the monolayer. Samples were imaged on a widefield  
560 microscope (IX-81, Olympus) equipped with an LED lamp (Excelitas Technologies), an  
561 Orca 16-bit charge-coupled device camera (Hamamatsu), an automated z-drift  
562 compensation IX3-ZDC (Olympus), an automated stage (Prior Scientific), an environmental  
563 chamber (Live Cell Instrument) and using a 10X objective (MPlanFL N 10X, 0.3 NA,  
564 Olympus). Cell motility was recorded at 10 min intervals over 48 hours. Manual cell  
565 tracking was performed using the TrackMate plugin through Fiji (53). The track number,  
566 the spot coordinates and the frame number were exported. Computation of the velocity and  
567 persistence were done using a custom made Matlab code.

### 568 **Gelatin islands and 2D cell-ECM adhesive competition assay**

569 To generate gelatin islands, we utilized the PDMS inserts (see *Fabrication of the spheroid*  
570 *imaging devices (SIDs)*). Briefly, 35 mm glass bottom dishes (MatTek Corporation) were  
571 coated with 50  $\mu\text{g/ml}$  poly-L-lysine (Sigma-Aldrich) for 20 min and air-dried. Then, PDMS  
572 rings were gently placed on top of the glass and sealed by gently pressing down. Next, each  
573 5.5 mm-diameter hole was coated with fluorescently labeled gelatin as previously described  
574 (31) (see *2D gelatin degradation assay*). 4T1-mScarlet and 67NR-GFP cells were plated in  
575 each hole at a 1 to 1 ratio. Cells were allowed to adhere for 1 h, after which the PDMS  
576 inserts were gently peeled off the glass and medium was added to the dishes. Finally, cells  
577 were fixed 24 h later with 4% paraformaldehyde (Alfa Aesar) for 10 min.

578 Samples were imaged on a widefield microscope (Eclipse Ti2-E, Nikon) equipped  
579 with a pco.panda sCMOS camera (PCO) and using a 10X objective (CFI Plan Fluor 10X,  
580 0.3 NA, Nikon). Tiles (6x6) were acquired to visualize the entire gelatin island surface. Live  
581 cells were imaged every 10 min and using an environmental chamber (Tokai Hit). The  
582 movie was annotated using the DrawArrowInMovie Fiji plugin (54). To quantify the 2D  
583 cell-ECM adhesive competition assay, we counted the number of 4T1 and 67NR cells that  
584 migrated off the gelatin islands. To quantify cell sorting in 2D, we only utilized regions  
585 coated with gelatin and we counted the number of homotypic neighbors.

### 586 **Measurements of the cell-ECM contact angle**

587 Measurement of the contact angle was performed as previously described (36). Briefly, 35  
588 mm glass bottom dishes (MatTek Corporation) were coated with fluorescently labeled  
589 gelatin as previously described (31) or with 50  $\mu\text{g/ml}$  poly-L-lysine (Sigma-Aldrich) for 20  
590 min and let to air dry. Cells were left to adhere for 5 h before imaging. Solitary cells, which  
591 had no physical interaction with nearby cells, were imaged on a laser scanning confocal  
592 microscope (FV1200, Olympus) using a 60X objective (UPLSAPO60XS, 1.35 NA,  
593 Olympus) equipped with an environmental chamber (In Vivo Scientific), with a 1  $\mu\text{m}$  z-

597 step. *Orthogonal Views* was used to measure the angle between the ECM and the main body  
598 of the cell: the contact angle.

### 600 **3D spheroid invasion assays**

601 For 4T1 and 67NR cell lines, 3D spheroids were generated by the hanging drop method.  
602 3,000 cells per 40  $\mu$ l drop containing 4.8 mg/mL methylcellulose (Sigma-Aldrich), 20  
603  $\mu$ g/mL Nutragen (Advanced Biomatrix), were placed on the lid of tissue culture dishes. The  
604 lids were carefully turned and placed on the bottom reservoir of the dishes filled with PBS  
605 to prevent evaporation. Alternatively, for MDA-MB-231 cell lines, 3D spheroids were  
606 generated in a 96-well V-bottom dish coated with 0.5% poly(2-hydroxyethyl methacrylate)  
607 (Sigma-Aldrich) in ethanol. Then, 5,000 cells in 50  $\mu$ l of medium were distributed to each  
608 well and the plate was centrifuged for 20 min at 1,000 x g and at 4°C. Finally, 50  $\mu$ l of  
609 Matrigel (Corning) was added to each well at a final concentration of 2.5%. The spheroids  
610 were formed over 3 days at 37 °C and 5% CO<sub>2</sub>, embedded in 30  $\mu$ l of 5 mg/mL rat tail  
611 Collagen I (Corning, alternate gelation protocol) and placed into the SIDs. Collagen I was  
612 polymerized at 37 °C for 30 min and then culture medium was added to the dishes. For drug  
613 treatments, cell culture medium containing 25  $\mu$ M GM6001 (resuspended in DMSO,  
614 Cayman Chemical), 10  $\mu$ M Y-27632 (resuspended in DMSO, Cayman Chemical) or 0.1%  
615 DMSO control was used.

616 For the experiments where 4T1-mScarlet cells surround the 67NR-GFP spheroids,  
617 4T1-mScarlet cells were added to the collagen mix containing the 67NR-GFP spheroids at  
618 10<sup>6</sup> cells/mL before polymerization of the collagen.

619 For the experiments where conditioned medium was used, 4T1-mScarlet cells were  
620 seeded onto a gelatin-coated 6-well plate, at 2x10<sup>6</sup> cells/well. 2 mL of complete DMEM  
621 were used per well and the embedded 67NR-GFP spheroids were cultured, from day 0,  
622 using the conditioned medium from the 4T1-mScarlet cells plated onto gelatin. Every two  
623 days, the conditioned medium was replaced.

624 Collagen was labeled as previously described (55), using 2  $\mu$ g/ml of 405-Alexa-  
625 NHS ester (Biotium).

626 To block E-cadherin, 5  $\mu$ g/ml of the blocking antibody (MABT26, Millipore) was  
627 used to disrupt cell-cell adhesions. Ecad-KD spheroids were generated as previously  
628 described (19). Briefly, cells were trypsinized, and resuspended at 1.5  $\times$  10<sup>4</sup> cells/ml in  
629 complete DMEM F12 medium (5% horse serum, 0.5  $\mu$ g/ml hydrocortisone, 20 ng/ml hEGF,  
630 10  $\mu$ g/ml insulin, 100 ng/ml cholera toxin, 1% penicillin/streptomycin) and 0.25%  
631 methylcellulose (Sigma-Aldrich). Cell suspension was seeded into non-adhesive, round-  
632 bottom 96-well plates (Corning), 200  $\mu$ l/well. The plate was centrifuged at 1000 rpm for 5  
633 min at room temperature and placed on the orbital shaker at 37°C, 5% CO<sub>2</sub> for 2h. The  
634 medium was replaced with a complete DMEM F12 containing 0.25% methylcellulose  
635 (Sigma-Aldrich) and 1% Matrigel (Corning). Spheroids were formed in the incubator for  
636 48h.

### 638 **Immunolabeling, imaging and analysis of fixed spheroids**

639 Immunofluorescence labeling was performed as previously described (33). Briefly, the  
640 embedded spheroids were simultaneously fixed and permeabilized in 4% paraformaldehyde  
641 and 0.5% Triton X-100 in PBS for 5 min, further fixed in 4% paraformaldehyde in PBS for  
642 20 min and blocked in 1% FBS/1% BSA in PBS at 4 °C for 24 h on a shaker. The embedded  
643 spheroids were then incubated with the anti-collagen I  $\frac{3}{4}$  (immunoGlobe, 0207-050), anti  
644 E-cadherin (Invitrogen, 13-1900), anti N-cadherin (BD Transduction Laboratories, 610920)  
645 and anti Tks5 (Millipore, MABT336) overnight at 4 °C and with secondary antibodies and  
646 Alexa Fluor 633 Phalloidin (Invitrogen) for 1 h at room temperature on a shaker.

647 Spheroids were imaged using a laser scanning confocal microscope (FV1200,  
648 Olympus) with a 10X (UPLXAPO10X, 0.4 NA, Olympus) or a 30X objective  
649 (UPLSAPO30XSIR, 1.05 NA, Olympus), using a 3-5  $\mu\text{m}$  z-step. To quantify the total  
650 spheroid area, spheroids were labeled with DAPI. The images were processed using a  
651 custom macro in Fiji. Briefly, slices were z-projected using the *Max Intensity* method and  
652 the nuclei were selected using the *Automatic Threshold* algorithm from Fiji. Then, the  
653 *Particle Analysis* tool was used to measure the total area of nuclei.

654 To quantify the E-cadherin signal, the slices of interest were z-projected using the  
655 *Max Intensity* method and strands or single cells were identified. For the relative  
656 junction/cytosol ratio: a 10  $\mu\text{m}$ -long line was drawn across and centered at the junction  
657 between two cells within a strand. The gray value along the line was measured for the E-  
658 cadherin and F-actin channel using the *Plot Profile* tool. The gray value at 0 and 5  $\mu\text{m}$  were  
659 defined as the “cytosol” and “junction” signal, respectively.

660 To quantify cell sorting, images were processed using a custom macro in Fiji. Since  
661 maximum projection of the z-slices introduces artefacts in the positions of cells, regarding  
662 the spheroid edge vs. core compartments, we utilized the median slice of the z-stack only.  
663 Briefly, the median slice was extracted from the z-stack and the spheroid core was selected  
664 in the brightfield channel using the *Automatic Threshold* algorithm from Fiji. Then, using  
665 the *Fit Ellipse* and *Centroid* options in *Measurements*, the coordinates of the spheroid core  
666 center and the major axis of the spheroid core were extracted. Finally, the *Multi-point* tool  
667 was used to record the coordinates of GFP+ and mScarlet+ cells. Cell sorting was quantified  
668 as the distance from the spheroid center to the cell (d in Fig. 2C) over the semi major axis  
669 of the spheroid (a in Fig. 2C). We defined this ratio as the “Distance Index” (DI).  
670 Alternatively, for mixed spheroids that contained non-labeled cells, like Tks5-CTL (Fig. 6)  
671 or 4T1 wild type cells (Fig. S12), DAPI staining was used to measure a cell’s coordinate.  
672 For a given tracked cell, we defined the  $\Delta\text{DI}$  as the DI for its final position minus the DI for  
673 its initial position.

### 674 **Live imaging of spheroids and image processing**

675 Live imaging of spheroids was performed either longitudinally (daily), to analyze cell  
676 sorting, or via time-lapse, to analyze cell motility. Confocal microscope (FV1200,  
677 Olympus) using a 10X objective (UPLXAPO10X, 0.4 NA, Olympus) equipped with an  
678 environmental chamber (Live Cell instrument) was used. Cell motility was recorded at 10-  
679 or 20-min intervals over 44 hours, with a 15  $\mu\text{m}$  z-step. Only slices where both the cells  
680 from the core and the edge compartments were visible, were used for tracking. Cell tracking  
681 was performed using the TrackMate plugin through Fiji (53). Spot detection was done using  
682 the LoG detector with median filtering and subpixel localization. Then, the linear motion  
683 LAP tracker was used to link spots. Tracks were filtered based on the number of spots in  
684 the track with a  $\geq 5$  spots/track cutoff. Tracks were visually validated and corrected if  
685 needed, using the TrackScheme tool. Finally, gaps in tracks were closed by introducing new  
686 spots. The new spots position was calculated using linear interpolation. For each track, the  
687 distance from the original spot to the spheroid-collagen I interface was measured and if this  
688 distance was  $\leq 30$   $\mu\text{m}$ , the track was classified as *edge*, otherwise the track was classified as  
689 *core*. The track number, the spot coordinates and the frame number were exported.  
690 Computation of the distance index was done using a custom made Matlab code (available  
691 upon request).

### 692 **Mean-squared displacement analysis of cells**

693 Coordinates of individual cell trajectories were obtained by particle tracking with the origin  
694 of each spheroid at (0,0), and were transformed from the Cartesian {x,y} to {r, $\phi$ } polar  
695  
696

coordinate system. Mean squared displacements (MSDs) were then calculated in radial and angular directions, averaged over different spheroids and experimental repeats for different conditions. The MSD data were then fit to a power law, in both directions, namely

$$\langle (r - r_0)^2 \rangle = \Gamma_r t^{\alpha_r} ,$$

and

$$\langle (\phi - \phi_0)^2 \rangle = \Gamma_\phi t^{\alpha_\phi} ,$$

where  $(r_0, \phi_0)$  correspond to the origin of each trajectory in the polar coordinate system,  $\Gamma_{r,\phi}$  correspond to the amplitudes of the power laws, and  $\alpha_{r,\phi}$  are the exponents, in radial and angular directions, respectively. MSD data were fit to these power laws using Levenberg-Marquart algorithm, with the range of fits in the interval [0, 3h]. Note that the motility of cells is sub-diffusive for  $\alpha < 1$ , diffusive for  $\alpha = 1$ , and super-diffusive for  $\alpha > 1$ .

In the radial direction, since the motion was found to be super-diffusive, we also calculated the time-dependent effective diffusion coefficient given by (56)

$$D_{eff}(t) = (\Gamma/2)t^{\alpha-1} ,$$

resulting in

$$\langle (r - r_0)^2 \rangle = 2 D_{eff}(t)t .$$

It is important to note that, for motion that is not diffusive, time-dependent  $D_{eff}(t)$  is the only way to estimate a diffusion coefficient with the correct units, and compare different data sets in a consistent way, as long as the same time points are chosen for comparison.

### Western blot assay

Cells were plated onto poly-L-lysine coated dishes and cultured to 80% confluency. Cells were harvested in ice-cold RIPA lysis buffer (Teknova), supplemented with protease inhibitors (complete cocktail, Roche) and phosphatase inhibitors (Halt cocktail, Sigma-Aldrich). SDS-PAGE was performed with 20  $\mu$ g protein per sample, transferred to a polyvinylidene difluoride membrane (Immobilon), blocked with 5% BSA/TBST for 3 h at room temperature and incubated with anti- $\beta$ -actin (Santa Cruz Biotechnology, sc-47778), anti-cortactin (Abcam, ab33333), anti-E-cadherin (BD Transduction Laboratories, 610181), anti-FAK (Santa Cruz Biotechnology, sc-271126), anti-phospho-FAK (Tyr397) (Invitrogen, 44625G) anti-N-cadherin (BD Transduction Laboratories, 610920) and anti-Tks5 (Millipore, MABT336) antibodies diluted in 5% BSA/TBST overnight at 4  $^{\circ}$ C. The membranes were then incubated with HRP conjugated anti-mouse or anti-rabbit IgG (Cell Signaling Technologies) antibodies diluted in 5% non-fat milk/TBST for 1 h at room temperature and proteins were visualized using chemiluminescence detection reagents (WesternBright, Advansta) and blot scanner (C-DiGit, LI-COR).

### Tissue Analyses

To form tumors in mice, 200,000 cells were suspended in 100  $\mu$ l of 20% collagen I in PBS and injected orthotopically into the mammary fat pad of 7-week-old female mice. For inoculation with mixtures of 4T1 or MDA-MB-231 cells, the cell ratio was 1:1, and 1:300 for 4T1:67NR. When the tumor diameter reached 8–12 mm, 14–20 days in Balb/cJ mice for 4T1 and 67NR, 8–10 weeks in SCID mice for MDA-MB-231, the animals were sacrificed and the tumors and lungs harvested. For lung clonogenic assay (57), lungs were minced, digested in a collagenase type IV/elastase cocktail (Worthington Biochemical) and filtered through a 70  $\mu$ m mesh. Then, the cell suspension from each lung was split into two tissue culture plates. One plate was incubated with a combination of 6-thioguanine (Cayman Chemicals) and puromycin, for growth of Tks5-CTL and Tks5-KD cells. The other plate was incubated with a combination of 6-thioguanine, puromycin and geneticin for growth of 4T1 Tks5-KD cells only, or with a combination of 0.5  $\mu$ g/ml puromycin and 500  $\mu$ g/ml

746 geneticin (Invitrogen) for growth of MDA-MB-231 D2-KD. After 14 days at 37 °C and 5%  
747 CO<sub>2</sub>, the colonies were fixed in methanol, stained using 0.03% (w/v) methylene blue  
748 (Sigma-Aldrich) and counted (4T1 and 67NR), or counted using fluorescent labeling (D2-  
749 KD).

750 To perform Western blots on tumors, Tks5-KD tumors were harvested, minced and digested  
751 in a freshly prepared collagenase type III (Worthington Biochemical) solution in HBSS,  
752 filtered through a 70 µm mesh and cultured for 7 days in the medium supplemented with 6-  
753 thioguanine and geneticin. Cells were lysed as described above.

754 To image tumor sections, tumors were fixed in 4% PFA, 4°C overnight, washed with ice  
755 cold PBS for 1h, transferred to 30% sucrose solution and incubated overnight at 4°C,  
756 embedded, frozen in O.C.T. and cut at 6 µm thickness. To increase 67NR-GFP signal, mixed  
757 4T1-67NR tumors were labeled with anti-GFP antibody primary antibody (ab13970) and  
758 goat anti-Chicken IgY H&L (Alexa Fluor® 488, ab150169), and nuclei were stained with  
759 DAPI.

### 760 **Data availability**

761 All data generated or analyzed during this study are included in this published article and  
762 its supplementary information files.  
763

### 764 **Statistics and Reproducibility**

765 RStudio software was used to perform all statistical analyses. The distribution of each data  
766 set was analyzed, and the Shapiro-Wilk test was performed to test for normality. For  
767 normally distributed data sets, an F test was performed to compare the variances of two data  
768 sets. Based on the results from the F test, a Welch two-sample t-test or a two-sample t-test  
769 was done to compare the means of the two data sets. For non-normally distributed data sets  
770 a Wilcoxon rank sum test was performed to compare the two data sets. Unless stated  
771 otherwise, all tests were performed using unpaired and two-sided criteria. All data are  
772 represented as line graphs or boxplots with median (line), 25th/75th percentiles (boxes) and  
773 maximum/minimum (whiskers). Statistical significance was defined as \*p<0.05, \*\*p<0.01,  
774 and \*\*\*p<0.001. Additional information on the metrics and statistics can be found in the  
775 source data file. All data are available upon request.  
776  
777

### 778 **References**

- 779 1. Howlader N, Noone A, Krapcho M, Miller D, Brest A, Yu M, Ruhl J, Tatalovich Z, Mariotto  
780 A, Lewis D, Chen H, Feuer E, Cronin K. SEER Cancer Statistics Review, 1975-2017, based  
781 on November 2019 SEER data submission [Internet]. National Cancer Institute. Bethesda,  
782 MD.
- 783 2. Vanharanta S, Massagué J. Origins of Metastatic Traits. *Cancer Cell*. (2013) **24**:410–21.
- 784 3. Cheung KJ, Padmanaban V, Silvestri V, Schipper K, Cohen JD, Fairchild AN, Gorin MA,  
785 Verdone JE, Pienta KJ, Bader JS, Ewald AJ. Polyclonal breast cancer metastases arise from  
786 collective dissemination of keratin 14-expressing tumor cell clusters. *Proc Natl Acad Sci*.  
787 (2016) **113**:E854–63.
- 788 4. Aceto N, Bardia A, Miyamoto DT, Donaldson MC, Wittner BS, Spencer JA, Yu M, Pely A,  
789 Engstrom A, Zhu H, Brannigan BW, Kapur R, Stott SL, Shioda T, Ramaswamy S, Ting DT,  
790 Lin CP, Toner M, Haber DA, Maheswaran S. Circulating Tumor Cell Clusters Are  
791 Oligoclonal Precursors of Breast Cancer Metastasis. *Cell*. (2014) **158**:1110–22.
- 792 5. Tabassum DP, Polyak K. Tumorigenesis: it takes a village. *Nat Rev Cancer*. (2015) **15**:473–  
793 83.
- 794 6. Yeung KT, Yang J. Epithelial-mesenchymal transition in tumor metastasis. *Mol Oncol*.  
795 (2017) **11**:28–39.



- 796 7. Pignatelli J, Tumbarello DA, Schmidt RP, Turner CE. Hic-5 promotes invadopodia  
797 formation and invasion during TGF- $\beta$ -induced epithelial-mesenchymal transition. *J Cell*  
798 *Biol.* (2012) **197**:421–37.
- 799 8. Eckert MA, Lwin TM, Chang AT, Kim J, Danis E, Ohno-Machado L, Yang J. Twist1-  
800 Induced Invadopodia Formation Promotes Tumor Metastasis. *Cancer Cell.* (2011) **19**:372–  
801 86.
- 802 9. Eckert MA, Santiago-Medina M, Lwin TM, Kim J, Courtneidge SA, Yang J. ADAM12  
803 induction by Twist1 promotes tumor invasion and metastasis via regulation of invadopodia  
804 and focal adhesions. *J Cell Sci.* (2017) **130**:2036–48.
- 805 10. Karamanou K, Franchi M, Vynios D, Brézillon S. Epithelial-to-mesenchymal transition and  
806 invadopodia markers in breast cancer: Lumican a key regulator. *Semin Cancer Biol.* (2020)  
807 **62**:125–33.
- 808 11. Murphy DA, Courtneidge SA. The “ins” and “outs” of podosomes and invadopodia:  
809 characteristics, formation and function. *Nat Rev Mol Cell Biol.* (2011) **12**:413–26.
- 810 12. Eddy RJ, Weidmann MD, Sharma VP, Condeelis JS. Tumor Cell Invadopodia: Invasive  
811 Protrusions that Orchestrate Metastasis. *Trends Cell Biol.* (2017) **27**:595–607.
- 812 13. Gligorijevic B, Bergman A, Condeelis J. Multiparametric classification links tumor  
813 microenvironments with tumor cell phenotype. *PLoS Biol.* (2014) **12**:e1001995.
- 814 14. Gligorijevic B, Wyckoff J, Yamaguchi H, Wang Y, Roussos ET, Condeelis J. N-WASP-  
815 mediated invadopodium formation is involved in intravasation and lung metastasis of  
816 mammary tumors. *J Cell Sci.* (2012) **125**:724–34.
- 817 15. Ye X, Weinberg RA. Epithelial-Mesenchymal Plasticity: A Central Regulator of Cancer  
818 Progression. *Trends Cell Biol.* (2015) **25**:675–86.
- 819 16. Cheung KJ, Gabrielson E, Werb Z, Ewald AJ. Collective invasion in breast cancer requires  
820 a conserved basal epithelial program. *Cell.* (2013) **155**:1639–51.
- 821 17. Zhang J, Goliwas KF, Wang W, Taufalele P V., Bordeleau F, Reinhart-King CA. Energetic  
822 regulation of coordinated leader–follower dynamics during collective invasion of breast  
823 cancer cells. *Proc Natl Acad Sci.* (2019) **116**:7867–72.
- 824 18. Wolf K, Wu YI, Liu Y, Geiger J, Tam E, Overall C, Stack MS, Friedl P. Multi-step  
825 pericellular proteolysis controls the transition from individual to collective cancer cell  
826 invasion. *Nat Cell Biol.* (2007) **9**:893–904.
- 827 19. Carey SP, Starchenko A, McGregor AL, Reinhart-King CA. Leading malignant cells initiate  
828 collective epithelial cell invasion in a three-dimensional heterotypic tumor spheroid model.  
829 *Clin Exp Metastasis.* (2013) **30**:615–30.
- 830 20. Westcott JM, Precht AM, Maine EA, Dang TT, Esparza MA, Sun H, Zhou Y, Xie Y,  
831 Pearson GW. An epigenetically distinct breast cancer cell subpopulation promotes collective  
832 invasion. *J Clin Invest.* (2015) **125**:1927–43.
- 833 21. Chapman A, Fernandez del Ama L, Ferguson J, Kamarashev J, Wellbrock C, Hurlstone A.  
834 Heterogeneous Tumor Subpopulations Cooperate to Drive Invasion. *Cell Rep.* (2014) **8**:688–  
835 95.
- 836 22. Bayarmagnai B, Perrin L, Esmaeili Pourfarhangi K, Graña X, Tüzel E, Gligorijevic B.  
837 Invadopodia-mediated ECM degradation is enhanced in the G1 phase of the cell cycle. *J Cell*  
838 *Sci.* (2019) **132**:jcs227116.
- 839 23. Miller BE, Miller FR, Wilburn DJ, Heppner GH. Analysis of tumour cell composition in  
840 tumours composed of paired mixtures of mammary tumour cell lines. *Br J Cancer.* (1987)  
841 **56**:561–9.
- 842 24. Dexter DL, Kowalski HM, Blazar BA, Fligiel Z, Vogel R, Heppner GH. Heterogeneity of  
843 tumor cells from a single mouse mammary tumor. *Cancer Res.* (1978) **38**:3174–81.
- 844 25. Aslakson CJ, Miller FR. Selective events in the metastatic process defined by analysis of the  
845 sequential dissemination of subpopulations of a mouse mammary tumor. *Cancer Res.* (1992)

- 846 **52**:1399–405.
- 847 26. Seki Y, Toba K, Fuse I, Sato N, Niwano H, Takahashi H, Tanabe N, Aizawa Y. In vitro  
848 effect of cyclosporin A, mitomycin C and prednisolone on cell kinetics in cultured human  
849 umbilical vein endothelial cells. *Thromb Res.* (2005) **115**:219–28.
- 850 27. Truong HH, Xiong J, Ghotra VPS, Nirmala E, Haazen L, Le Devedec SE, Balcio lu HE, He  
851 S, Snaar-Jagalska BE, Vreugdenhil E, Meerman JHN, van de Water B, Danen EHJ. 1  
852 Integrin Inhibition Elicits a Prometastatic Switch Through the TGF -miR-200-ZEB Network  
853 in E-Cadherin-Positive Triple-Negative Breast Cancer. *Sci Signal.* (2014) **7**:ra15–ra15.
- 854 28. Ilina O, Campanello L, Gritsenko PG, Vullings M, Wang C, Bult P, Losert W, Friedl P.  
855 Intravital microscopy of collective invasion plasticity in breast cancer. *Dis Model Mech.*  
856 (2018) **11**:dmm034330.
- 857 29. Lou Y, Preobrazhenska O, Auf Dem Keller U, Sutcliffe M, Barclay L, McDonald PC,  
858 Roskelley C, Overall CM, Dedhar S. Epithelial-Mesenchymal Transition (EMT) is not  
859 sufficient for spontaneous murine breast cancer metastasis. *Dev Dyn.* (2008) **237**:2755–68.
- 860 30. Konen J, Summerbell E, Dwivedi B, Galior K, Hou Y, Rusnak L, Chen A, Saltz J, Zhou W,  
861 Boise LH, Vertino P, Cooper L, Salaita K, Kowalski J, Marcus AI. Image-guided genomics  
862 of phenotypically heterogeneous populations reveals vascular signalling during symbiotic  
863 collective cancer invasion. *Nat Commun.* (2017) **8**:15078.
- 864 31. Sharma VP, Entenberg D, Condeelis J. High-Resolution Live-Cell Imaging and Time-Lapse  
865 Microscopy of Invadopodium Dynamics and Tracking Analysis. In: Coutts AS, editor.  
866 Methods in molecular biology (Clifton, NJ). Totowa, NJ: Humana Press; p. 343–57.  
867 (Methods in Molecular Biology; vol. 1046).
- 868 32. Pourfarhangi KE, Bergman A, Gligorijevic B. ECM Cross-Linking Regulates Invadopodia  
869 Dynamics. *Biophys J.* (2018) **114**:1455–66.
- 870 33. Perrin L, Tucker T, Gligorijevic B. Time-Resolved Fluorescence Imaging and Analysis of  
871 Cancer Cell Invasion in the 3D Spheroid Model. *J Vis Exp.* (2021):1–14.
- 872 34. Smyrek I, Mathew B, Fischer SC, Lissek SM, Becker S, Stelzer EHK. E-cadherin, actin,  
873 microtubules and FAK dominate different spheroid formation phases and important elements  
874 of tissue integrity. *Biol Open.* (2019) **8**:bio037051.
- 875 35. Steinberg MS. Reconstruction of Tissues by Dissociated Cells. *Science (80- ).* (1963)  
876 **141**:401–8.
- 877 36. Cerchiari AE, Garbe JC, Jee NY, Todhunter ME, Broaders KE, Peehl DM, Desai TA,  
878 LaBarge MA, Thomsonf M, Gartner ZJ. A strategy for tissue self-organization that is robust  
879 to cellular heterogeneity and plasticity. *Proc Natl Acad Sci U S A.* (2015) **112**:2287–92.
- 880 37. Labernadie A, Kato T, Brugués A, Serra-Picamal X, Derzsi S, Arwert E, Weston A,  
881 González-Tarragó V, Elosegui-Artola A, Albertazzi L, Alcaraz J, Roca-Cusachs P, Sahai E,  
882 Trepát X. A mechanically active heterotypic E-cadherin/N-cadherin adhesion enables  
883 fibroblasts to drive cancer cell invasion. *Nat Cell Biol.* (2017) **19**:224–37.
- 884 38. Leong HS, Robertson AE, Stoletov K, Leith SJ, Chin CA, Chien AE, Hague MN, Ablack A,  
885 Carmine-Simmen K, McPherson VA, Postenka C, Turley EA, Courtneidge SA, Chambers  
886 AF, Lewis JD. Invadopodia Are Required for Cancer Cell Extravasation and Are a  
887 Therapeutic Target for Metastasis. *Cell Rep.* (2014) **8**:1558–70.
- 888 39. Ilina O, Gritsenko PG, Syga S, Lippoldt J, La Porta CAM, Chepizhko O, Grosser S, Vullings  
889 M, Bakker G-J, Starrau J, Bult P, Zapperi S, Käs JA, Deutsch A, Friedl P. Cell–cell adhesion  
890 and 3D matrix confinement determine jamming transitions in breast cancer invasion. *Nat*  
891 *Cell Biol.* (2020).
- 892 40. Harney AS, Arwert EN, Entenberg D, Wang Y, Guo P, Qian B-Z, Oktay MH, Pollard JW,  
893 Jones JG, Condeelis JS. Real-Time Imaging Reveals Local, Transient Vascular Permeability,  
894 and Tumor Cell Intravasation Stimulated by TIE2hi Macrophage-Derived VEGFA. *Cancer*  
895 *Discov.* (2015) **5**:932–43.

- 896 41. Yang J, Mani SA, Donaher JL, Ramaswamy S, Itzykson RA, Come C, Savagner P, Gitelman  
897 I, Richardson A, Weinberg RA. Twist, a Master Regulator of Morphogenesis, Plays an  
898 Essential Role in Tumor Metastasis. *Cell*. (2004) **117**:927–39.
- 899 42. Padmanaban V, Krol I, Suhail Y, Szczerba BM, Aceto N, Bader JS, Ewald AJ. E-cadherin  
900 is required for metastasis in multiple models of breast cancer. *Nature*. (2019) **573**:439–44.
- 901 43. Aiello NM, Maddipati R, Norgard RJ, Balli D, Li J, Yuan S, Yamazoe T, Black T, Sahnoud  
902 A, Furth EE, Bar-Sagi D, Stanger BZ. EMT Subtype Influences Epithelial Plasticity and  
903 Mode of Cell Migration. *Dev Cell*. (2018) **45**:681–695.e4.
- 904 44. Nieto MA, Huang RYYJ, Jackson RAA, Thiery JPP. EMT: 2016. *Cell*. (2016) **166**:21–45.
- 905 45. Tester AM, Ruangpanit N, Anderson RL, Thompson EW. MMP-9 secretion and MMP-2  
906 activation distinguish invasive and metastatic sublines of a mouse mammary carcinoma  
907 system showing epithelial-mesenchymal transition traits. *Clin Exp Metastasis*. (2000)  
908 **18**:553–60.
- 909 46. Johnstone CN, Smith YE, Cao Y, Burrows AD, Cross RSN, Ling X, Redvers RP, Doherty  
910 JP, Eckhardt BL, Natoli AL, Restall CM, Lucas E, Pearson HB, Deb S, Britt KL, Rizzitelli  
911 A, Li J, Harmey JH, Pouliot N, Anderson RL. Functional and molecular characterisation of  
912 EO771.LMB tumours, a new C57BL/6-mouse-derived model of spontaneously metastatic  
913 mammary cancer. *Dis Model Mech*. (2015) **8**:237–51.
- 914 47. Heisenberg C-P, Bellaïche Y. Forces in Tissue Morphogenesis and Patterning. *Cell*. (2013)  
915 **153**:948–62.
- 916 48. Beatrice CP, Brunnet LG. Cell sorting based on motility differences. *Phys Rev E*. (2011)  
917 **84**:031927.
- 918 49. Mori H, Gjorevski N, Inman JL, Bissell MJ, Nelson CM. Self-organization of engineered  
919 epithelial tubules by differential cellular motility. *Proc Natl Acad Sci*. (2009) **106**:14890–5.
- 920 50. Pawlizak S, Fritsch AW, Grosser S, Ahrens D, Thalheim T, Riedel S, Kießling TR, Oswald  
921 L, Zink M, Manning ML, Käs JA. Testing the differential adhesion hypothesis across the  
922 epithelial–mesenchymal transition. *New J Phys*. (2015) **17**:083049.
- 923 51. Villeneuve C, Lagoutte E, de Plater L, Mathieu S, Manneville J-B, Maître J-L, Chavrier P,  
924 Rossé C. aPKC $\alpha$  triggers basal extrusion of luminal mammary epithelial cells by tuning  
925 contractility and vinculin localization at cell junctions. *Proc Natl Acad Sci*. (2019)  
926 **116**:24108–14.
- 927 52. Chen W-T, Yeh Y, Nakahara H. An in vitro cell invasion assay: Determination of cell surface  
928 proteolytic activity that degrades extracellular matrix. *J Tissue Cult Methods*. (1994) **16**:177–  
929 81.
- 930 53. Tinevez J-Y, Perry N, Schindelin J, Hoopes GM, Reynolds GD, Laplantine E, Bednarek SY,  
931 Shorte SL, Eliceiri KW. TrackMate: An open and extensible platform for single-particle  
932 tracking. *Methods*. (2017) **115**:80–90.
- 933 54. Daetwyler S, Modes CD, Fiolka R. Fiji plugin for annotating movies with custom arrows.  
934 *Biol Open*. (2020) **9**:3–6.
- 935 55. Di Martino J, Henriot E, Ezzoukhry Z, Mondal C, Bravo-Cordero JJ, Moreau V, Saltel F. 2D  
936 and 3D Matrices to Study Linear Invadosome Formation and Activity. *J Vis Exp*. (2017):1–  
937 9.
- 938 56. Wu J, Berland KM. Propagators and Time-Dependent Diffusion Coefficients for Anomalous  
939 Diffusion. *Biophys J*. (2008) **95**:2049–52.

## 941 Acknowledgments

942 We would like to thank the flow cytometry core at Lewis Katz School of Medicine for assistance  
943 with cell sorting, and the members of Temple Bioengineering and Fox Chase Cancer  
944 Center Biology for valuable discussions.

945 Funding was provided by NIH R00 CA172360, R01 CA230777 (BG) and R01 GM121679 (ET);  
946 American Cancer Society Research Scholar Grant 134415-RSG-20-034-01-CSM (BG)  
947 and Conquer Cancer Now/Young Investigator Award (BG).  
948

949 **Author contributions:**

950 Conceptualization: LP, BG  
951 Data acquisition: LP, EB, BB, BG  
952 Analysis: LP, EB, BG, ET  
953 Supervision: BG  
954 Writing: LP, EB, BB, ET, BG  
955

956 **Competing interests:** Authors declare that they have no competing interests.  
957  
958

959 **Figures**  
960 **Fig. 1**

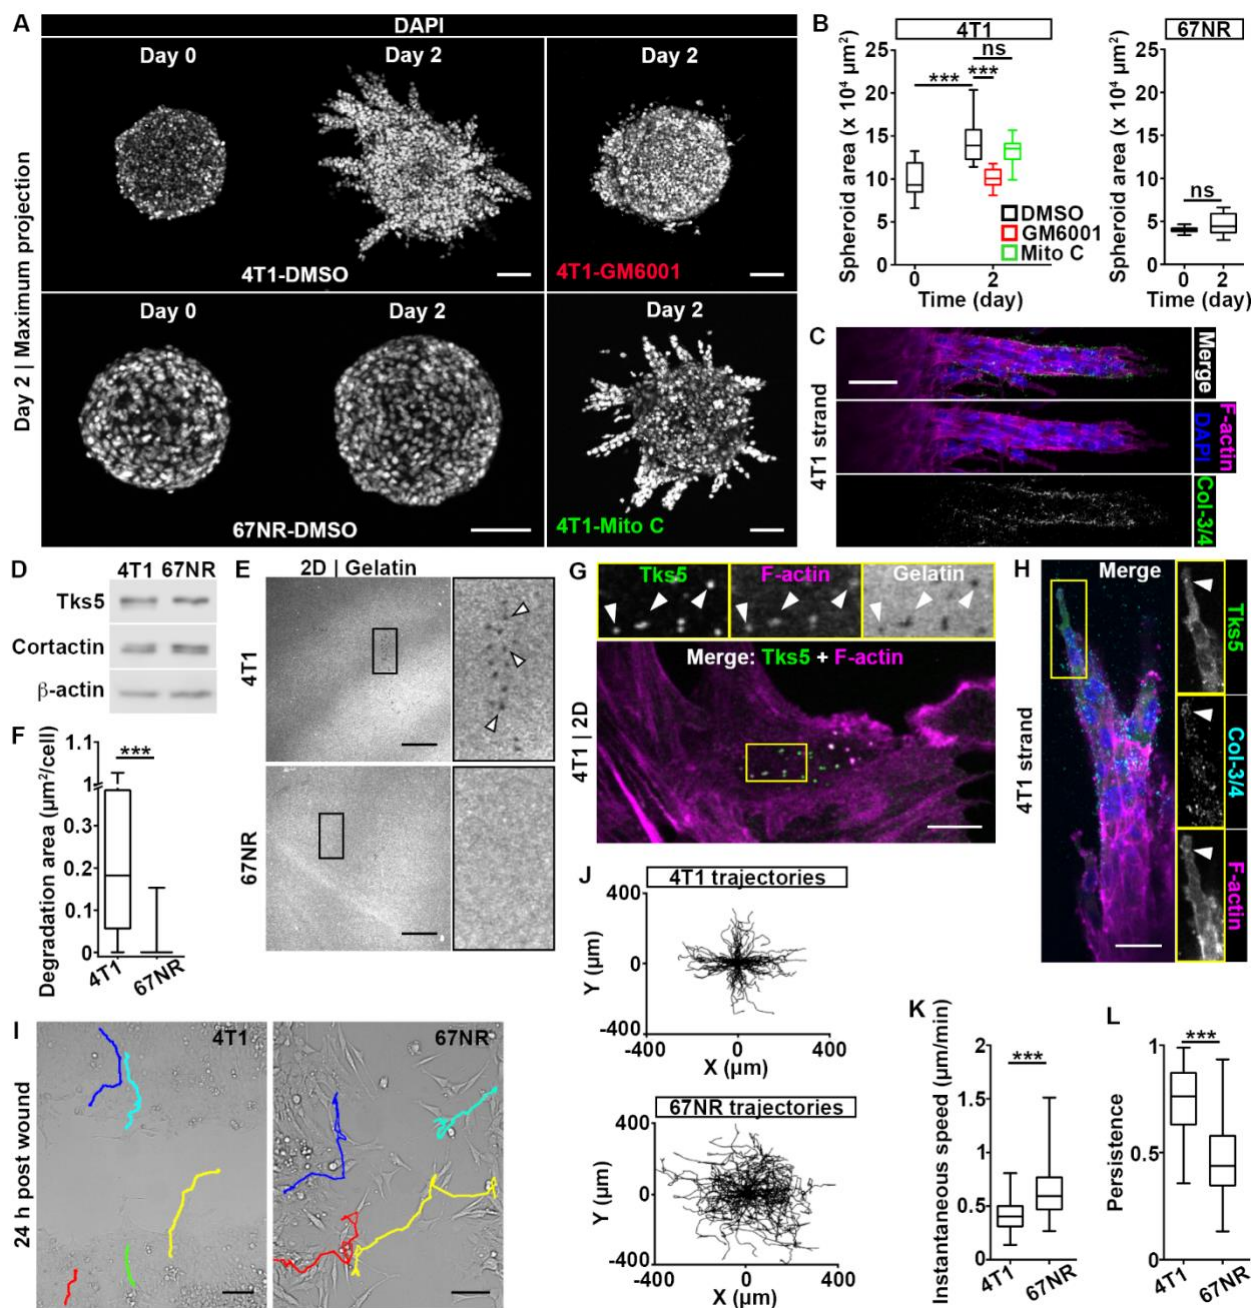

961

962

963

964

965

966

967

968

969

970

971

972

**Fig. 1. 4T1 cells, but not 67NR cells, exhibit MMP-dependent spheroid invasion.** (A) Spheroids of 4T1 and 67NR cells at day 0 and day 2 post-embedding in a 3D collagen I matrix. Nuclei were stained with DAPI. Spheroids were treated from day 0 with a pan-MMP inhibitor (GM6001, top right panel), a cell cycle inhibitor (mitomycin C, Mito C, bottom right panel) or DMSO control (left panels). Scale bars: 100  $\mu\text{m}$ . (B) Spheroid area as a function of time for 4T1 and 67NR cells from (A).  $P=5.81 \times 10^{-4}$  and  $1.23 \times 10^{-4}$ , by the t-test. (C) Invading strand of a 4T1 spheroid, day 2 post-embedding, immunolabeled for MMP-cleaved collagen I (Col-3/4, green) and stained for F-actin (phalloidin, magenta) and nuclei (DAPI, blue). Scale bar: 50  $\mu\text{m}$ . (D) Western blot of Tks5 and cortactin expression in 4T1 and 67NR cells.  $\beta$ -actin is used as a loading control. (E) Gelatin degradation for 4T1 (top panel) and 67NR (bottom panel) cells 18 h post-plating. The insets show a 4X zoom-in of the boxed area and arrowheads indicate representative degradation holes. Scale

973 bars: 20  $\mu\text{m}$ . See Fig. S3A for F-actin. **(F)** Degradation area for 4T1 and 67NR cells from (E).  
974  $P < 4.40 \times 10^{-16}$ , by the Wilcoxon rank sum test. **(G)** 4T1 cells cultured on fluorescent gelatin (gray),  
975 labeled for Tks5 (green) and F-actin (phalloidin, magenta). The insets show a 2X zoom-in of the  
976 boxed area and arrowheads indicate representative functional invadopodia. Scale bar: 10  $\mu\text{m}$ . **(H)**  
977 4T1 strand on day 2 days post-embedding, labeled for Tks5 (green), cleaved collagen (cyan), F-  
978 actin (magenta) and nuclei (blue). The insets show a 1.25X zoom-in of the boxed area. Scale bar:  
979 30  $\mu\text{m}$ . **(I)** 4T1 (left) and 67NR (right) monolayers 24 h post-wounding. Representative cell  
980 trajectories are shown. See Movie S1. Scale bars: 100  $\mu\text{m}$ . **(J)** Trajectories of 4T1 (top) and 67NR  
981 (bottom) cells from the wound assay in (I), shown as wind-rose plots shifted to a common origin.  
982 **(K)** Instantaneous speed of 4T1 and 67NR cells from (J).  $P = 1.17 \times 10^{-13}$ , by the Wilcoxon rank sum  
983 test. **(L)** Persistence (net displacement/path length) of 4T1 and 67NR cells from (J).  $P < 2.20 \times 10^{-16}$ ,  
984 by the Wilcoxon rank sum test.  
985

986 **Fig. 2**

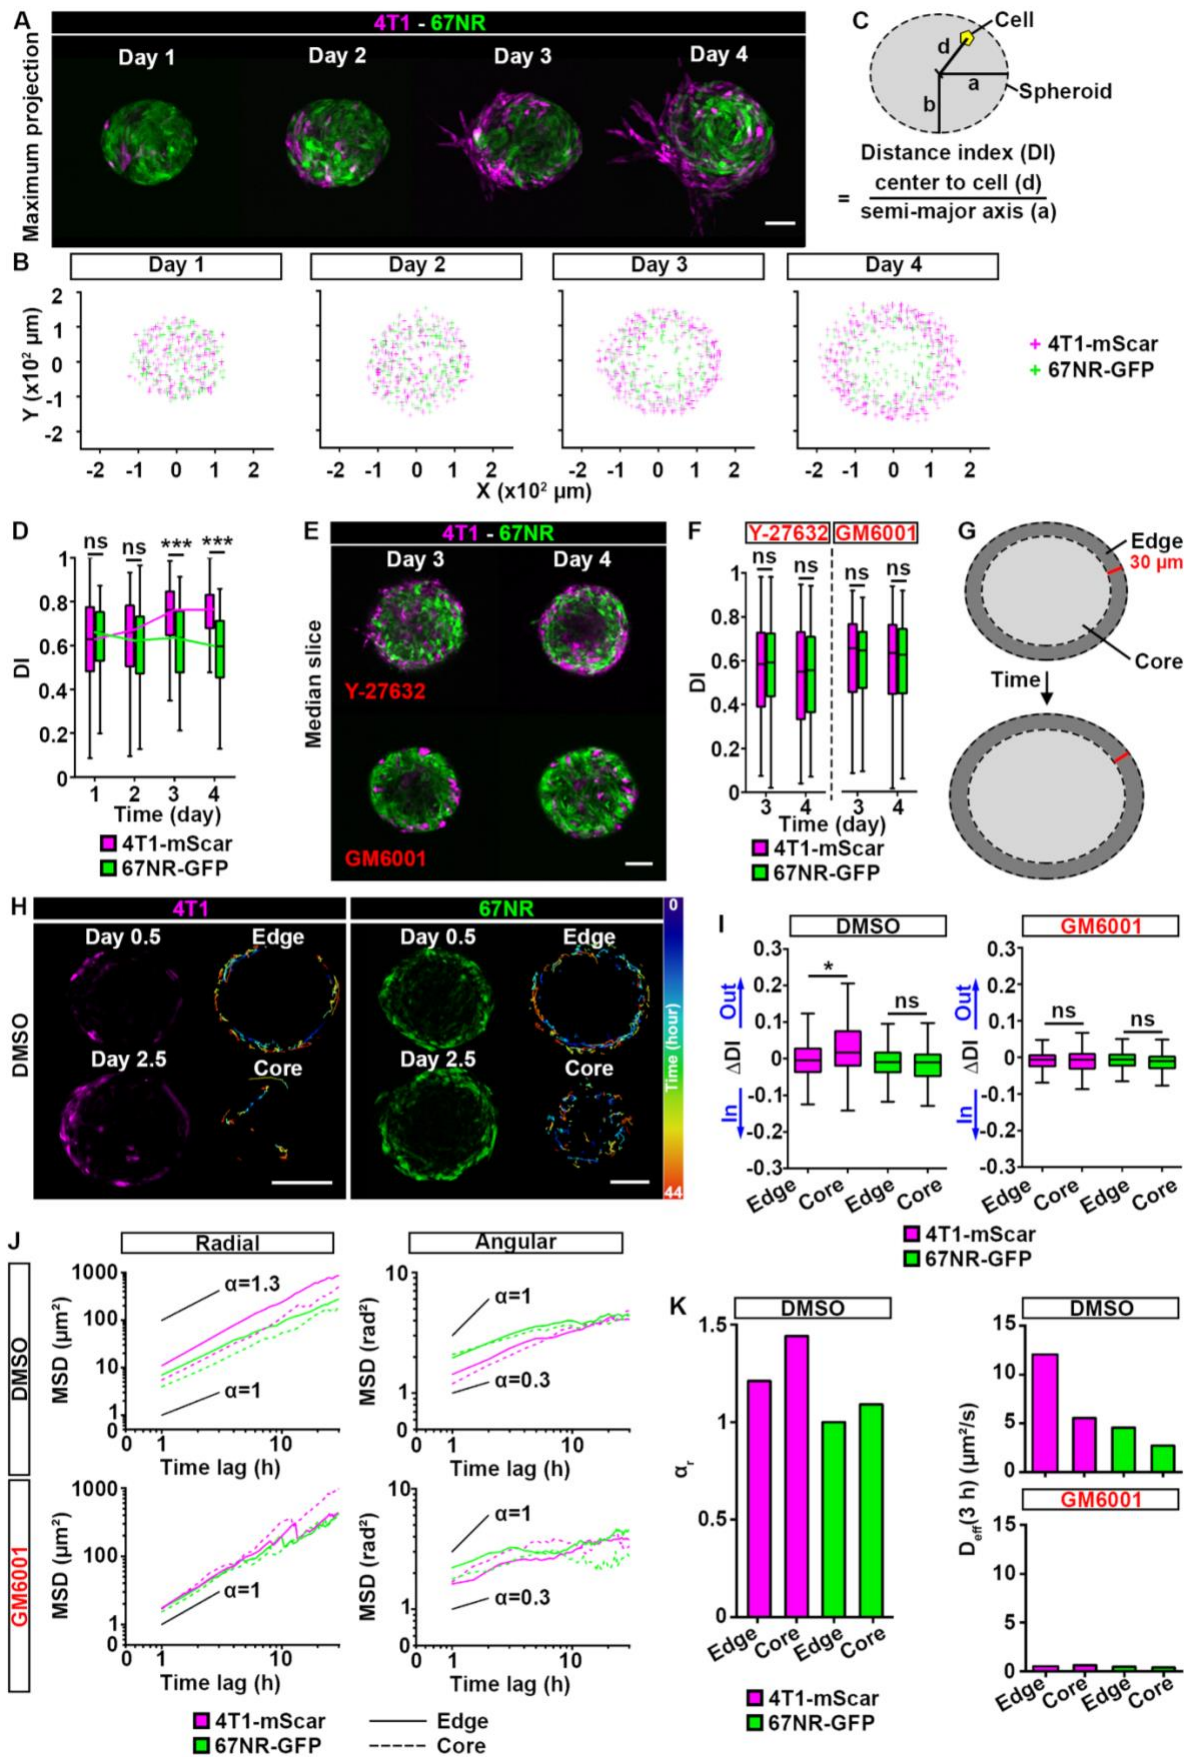

988 **Fig. 2. Prior to invasion, 4T1 cells sort from 67NR cells via differential directed motility.** (A)  
989 Mixed spheroid, at a 1:50 ratio of 4T1-mScarlet (magenta) to 67NR-GFP (green) cells, embedded  
990 in 3D collagen I and imaged daily. Day 1 indicates day 1 post-embedding. See Movie S2. Scale  
991 bar: 100  $\mu\text{m}$ . (B) Coordinates of 4T1-mScarlet (4T1-mScar, magenta) and 67NR-GFP (green) cells  
992 from all spheroids presented in (A) and Fig. S3C. (C) Schematic representation of the distance  
993 index (DI); a and b represent the semi-major/minor axes of the spheroid and d represents distance  
994 between the spheroid center and a cell. DI is  $d/a$ , the relative distance of each cell to the spheroid  
995 center, see Materials and Methods. (D) DI for 4T1-mScarlet (magenta) and 67NR-GFP (green  
996 boxes) cells from spheroids in (A, B).  $P=1.32 \times 10^{-14}$  and  $<2.20 \times 10^{-16}$ , by the Wilcoxon rank sum  
997 test. (E) Mixed spheroids at day 3 and 4 post-embedding. Spheroids were treated from day 0 with  
998 an inhibitor of cell contractility (ROCK inhibitor, Y-27632, top panels) or a pan-MMP inhibitor  
999 (GM6001, bottom panels). Scale bar: 100  $\mu\text{m}$ . (F) DI for 4T1-mScarlet (magenta) and 67NR-GFP  
1000 (green) cells from spheroids in (E). (G) Schematic of the edge (dark gray) and core (light gray)  
1001 compartments in a spheroid. (H) Snapshots of a mixed spheroid taken at the beginning (day 0.5, 10  
1002 hours post-embedding) and end of time-lapse recording (day 2.5, 54 h post-embedding). For 4T1-  
1003 mScarlet and 67NR-GFP cells, representative cell trajectories in the edge and core compartments,  
1004 color-coded according to time, are shown (right panels). Scale bars: 100  $\mu\text{m}$ . (I)  $\Delta$  Distance Index  
1005 ( $\Delta$ DI) for 4T1-mScarlet (magenta) and 67NR-GFP (green) cells from spheroids in (H). Also see  
1006 Movies S3-6. A positive  $\Delta$ DI indicates cell motility towards the spheroid edge (“Out”), and a  
1007 negative  $\Delta$ DI indicates movement towards the spheroid center (“In”). Spheroids were treated from  
1008 day 0 with DMSO control (left) or GM6001 (right).  $P=0.0204$ , by the Wilcoxon rank sum test. (J)  
1009 Mean square displacements (MSDs) for 4T1-mScarlet (magenta) and 67NR-GFP (green) cells from  
1010 spheroids in (H). MSDs were calculated in the radial (left) and angular (right) directions of the polar  
1011 coordinate system for edge (solid lines) and core (dashed lines) cells in spheroids treated with  
1012 DMSO (top) and GM6001 (bottom), respectively. The plots are shown in log-log scale, highlighting  
1013 the super-diffusive ( $\alpha > 1$ ), diffusive ( $\alpha = 1$ ), and sub-diffusive ( $\alpha < 1$ ) nature of motility. Solid lines  
1014 serve as guides to the eye, indicating the average slopes ( $\alpha$  values) corresponding to these different  
1015 motility modalities. (K) Power law exponent  $\alpha_r$  is shown (left) for 4T1-mScarlet (magenta) and  
1016 67NR-GFP (green) cells from *edge* and *core* compartments in a spheroid. Effective diffusion  
1017 coefficient in radial direction is shown for DMSO control (top right) or GM6001 (bottom right)  
1018 from edge and core compartments in a spheroid.  
1019  
1020



1021

**Fig. 3**

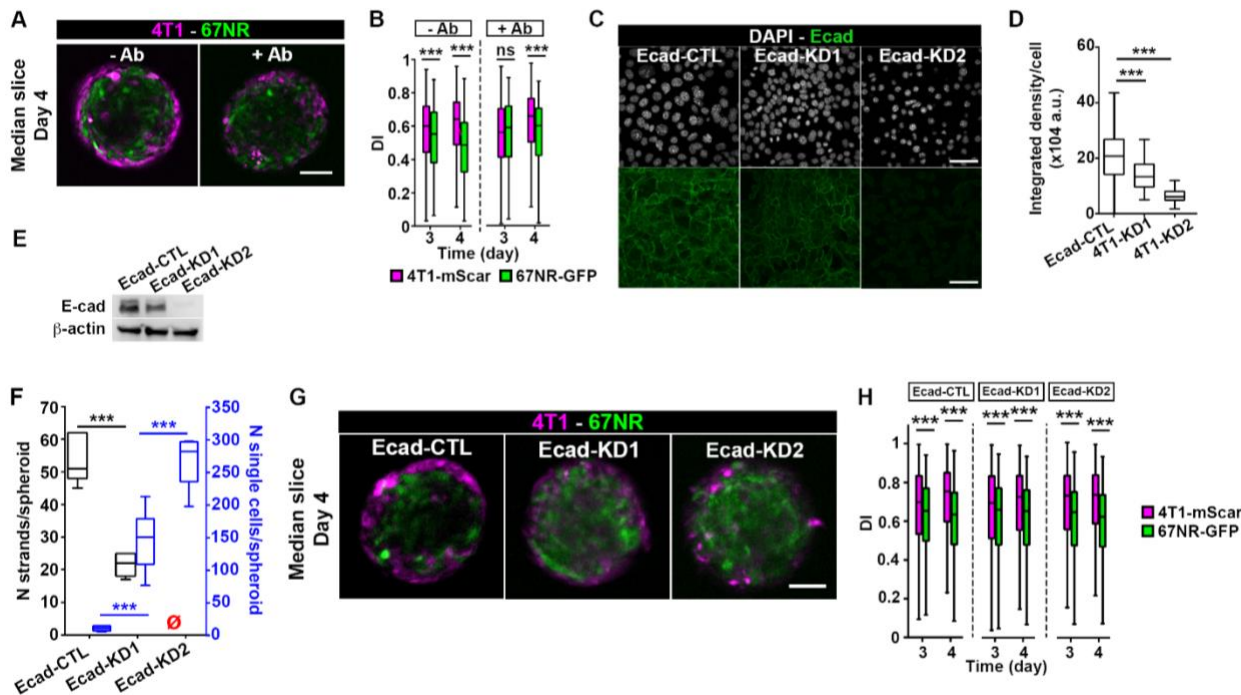

1022

1023

1024

1025

1026

1027

1028

1029

1030

1031

1032

1033

1034

1035

1036

1037

1038

1039

1040

1041

1042

1043

1044

1045

1046

1047

1048

1049

1050

**Fig. 3 Disruption of cell-cell adhesions does not affect cell sorting.**

(A) Mixed spheroids, at a 1:50 ratio, imaged on day 4 post-embedding. Spheroids were treated with (+Ab, right panel) or without (-Ab, left panel) an E-cadherin blocking antibody. Scale bar: 100  $\mu$ m. (B) DI for 4T1-mScar (magenta boxes) and 67NR-GFP (green boxes) cells from spheroids in (A).  $P=2.78\times 10^{-5}$ ,  $<2.2\times 10^{-16}$  and  $1.12\times 10^{-12}$  respectively, by the Wilcoxon rank sum test. (C) Ecad-CTL, Ecad-KD1 and -KD2 cells in 2D. E-cadherin (green, bottom panels) and nuclei (gray, top panels) are shown. (D) Integrated density of the E-cadherin signal from cells in (C).  $P=4.85\times 10^{-12}$  and  $<2.2\times 10^{-16}$ , by the Wilcoxon rank sum test. (E) Western-blot of E-cadherin expression in Ecad-CTL, -KD1 and -KD2 cells.  $\beta$ -actin is used as a loading control. (F) Number of strands per spheroid (black) and number of single cells per spheroid (blue) for Ecad-CTL, -KD1 or -KD2 spheroids. The red empty symbols indicate zero values.  $P=9.01\times 10^{-10}$ ,  $1.06\times 10^{-3}$  and  $1.74\times 10^{-5}$ , by the t-test. (G) Mixed spheroids, at a 1:50 ratio, imaged on day 4 post-embedding. Ecad-CTL, -KD1 or -KD2 cells were used. Scale bar: 100  $\mu$ m. (H) DI for Ecad-CTL, -KD1 and -KD2 (magenta boxes) and 67NR-GFP (green boxes) cells from spheroids in (G).  $P=4.72\times 10^{-5}$ ,  $<2.20\times 10^{-16}$ ,  $2.21\times 10^{-5}$ ,  $2.12\times 10^{-15}$ ,  $2.05\times 10^{-13}$  and  $<2.20\times 10^{-16}$ , by the Wilcoxon rank sum test.

1051

**Fig. 4**

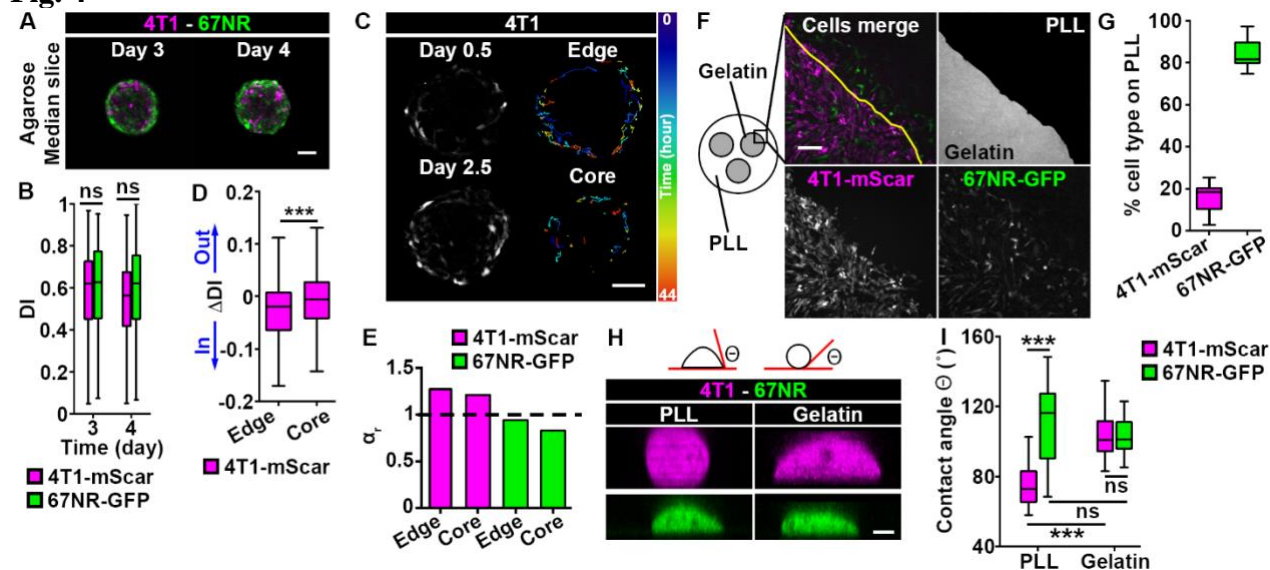

1052

1053

1054

1055

1056

1057

1058

1059

1060

1061

1062

1063

1064

1065

1066

1067

1068

1069

1070

1071

**Fig. 4. 4T1, but not 67NR, cells are sensitive to the presence of adhesive ECM.** (A) Mixed spheroids in agarose matrix imaged on day 3 or 4 post-embedding. Scale bar: 100  $\mu$ m. (B) DI for 4T1-mScarlet (magenta boxes) and 67NR-GFP (green boxes) cells from spheroids in (A). (C) Snapshots of 44 h-long time-lapse recording of a mixed spheroid cultured in a 3D collagen I matrix. Images were taken at 10 h (day 0.5) and 54 h (day 2.5) post-embedding. For clarity, only 4T1-mScarlet cells are shown. Representative cell trajectories, color-coded according to time, are shown (right panels). Also see Movies S7-9. Scale bar: 100  $\mu$ m. (D)  $\Delta$ DI for 4T1-mScarlet cells from spheroids in (C).  $P=7.50 \times 10^{-4}$ , by the Wilcoxon rank sum test. (E) Power law exponent  $\alpha_r$  is shown for 4T1-mScarlet (magenta bars) and 67NR-GFP (green bars) cells from *edge* and *core* compartments. (F) Schematic (left) of the 2D cell-ECM competition assay and zoom-in to cells present at the gelatin/poly-L-lysine (PLL) interface 24 h post-plating (top, right panel). 4T1-mScarlet (bottom, left panel) and 67NR-GFP (bottom, right panel) cells were plated on the gelatin islands only. Also see Movie S10. Scale bar: 200  $\mu$ m. (G) Percentage of 4T1-mScarlet (magenta boxes) and 67NR-GFP (green boxes) cells on poly-L-lysine (PLL) from (F). (H) Schematic of the contact angle ( $\theta$ ) (top) and orthogonal, xz views of 4T1-mScarlet and 67NR-GFP cells on poly-L-lysine (PLL) or gelatin, 5 h post-plating. Scale bar: 5  $\mu$ m. (I) Contact angle  $\theta$  for cells from (H). PLL, 4T1 vs. 67NR:  $P=1.25 \times 10^{-9}$ ; 4T1, PLL vs. gelatin:  $P=4.13 \times 10^{-10}$ , by the Wilcoxon rank sum test.

1072 **Fig. 5**

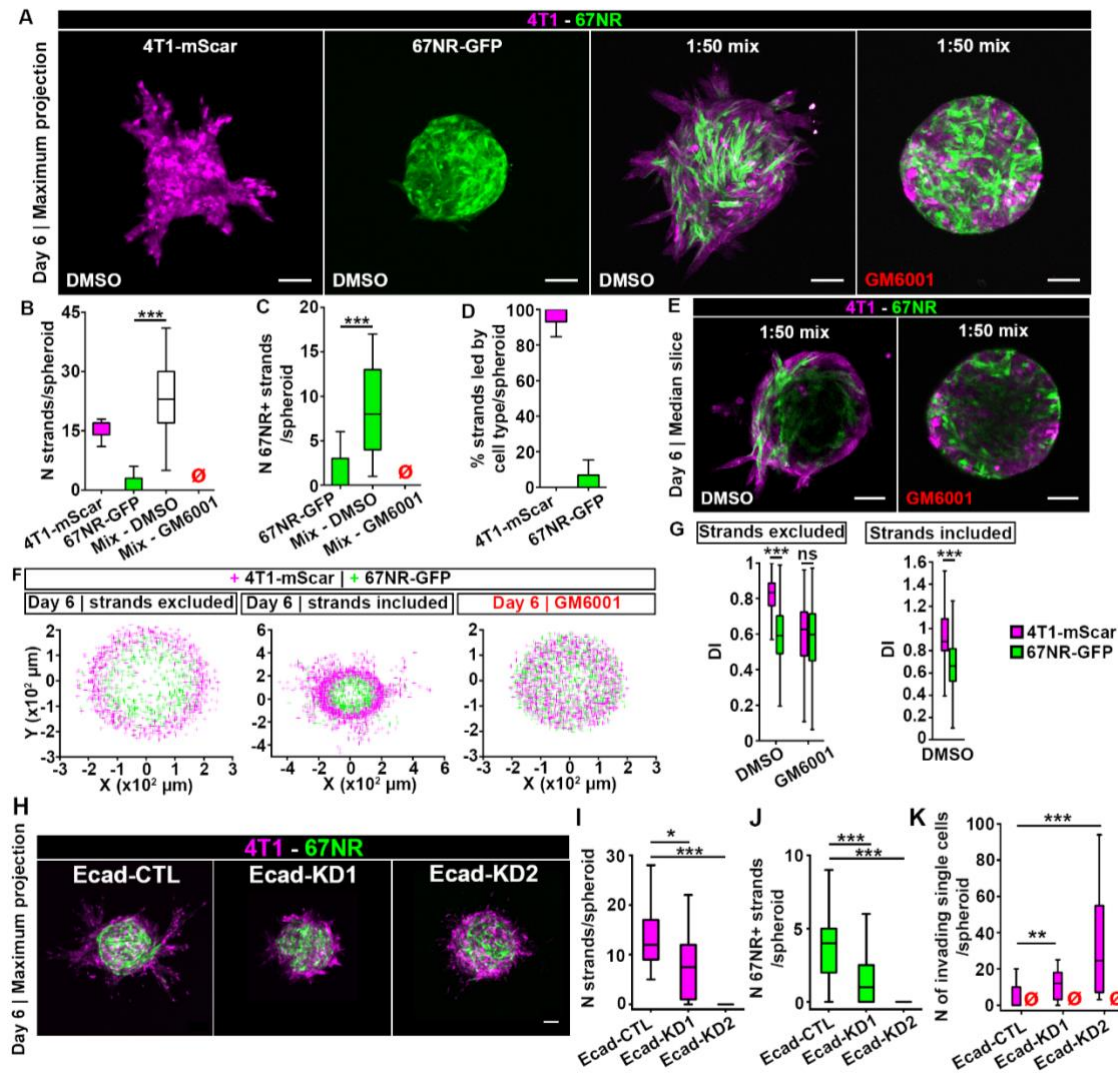

1073  
 1074  
 1075  
 1076  
 1077  
 1078  
 1079  
 1080  
 1081  
 1082  
 1083  
 1084  
 1085  
 1086  
 1087  
 1088  
 1089  
 1090

**Fig. 5. 4T1 cells lead 67NR cells in an MMP-dependent cooperative invasion.**

(A) Spheroids made of a single or mixed (1:50) 4T1-mScarlet and 67NR-GFP cells, imaged at day 6 post-embedding. Spheroids were treated with DMSO control (left panels) or GM6001 (right panel). Scale bars: 100 μm. (B-D) Number of strands per spheroid (B), the number of strands containing 67NR cells (67NR+) (C), and the percent of strands led by 4T1-mScarlet (magenta boxes) or 67NR-GFP (green boxes) cells (D) for single or mixed (white box) spheroids from (A). The red empty symbols indicate zero values.  $P=1.90 \times 10^{-7}$  (B) and  $9.86 \times 10^{-6}$  (C), by the Wilcoxon rank sum test. (E) Median slice of mixed spheroids from (A). Scale bars: 100 μm. (F) Coordinates of 4T1-mScarlet (magenta) and 67NR-GFP (green crosses) cells from mixed spheroids in (E). Cells present in strands were excluded (left panel) or included (middle panel) in the analysis. (G) DIs for 4T1-mScarlet (magenta) and 67NR-GFP (green) cells from spheroids in (E, F).  $P < 2.20 \times 10^{-16}$  and  $< 2.20 \times 10^{-16}$ , by the Wilcoxon rank sum test. (H) Spheroids of Ecad-CTL, -KD1 or -KD2 cells mixed with 67NR at a 1:50 ratio, imaged at day 6 post-embedding. Scale bar: 100 μm. (I-J) Number of strands (I) and number of strands containing 67NR-GFP cells (67NR+) (J) for spheroids from (H).  $P=0.02$  and  $6.1 \times 10^{-5}$  in (I);  $0.00073$  and  $8.70 \times 10^{-8}$  in (J), by the Wilcoxon rank sum test. (K) Number of single cells found outside of spheroid core, for spheroids from (H).  $P=0.02$  and  $6.1 \times 10^{-5}$

1091

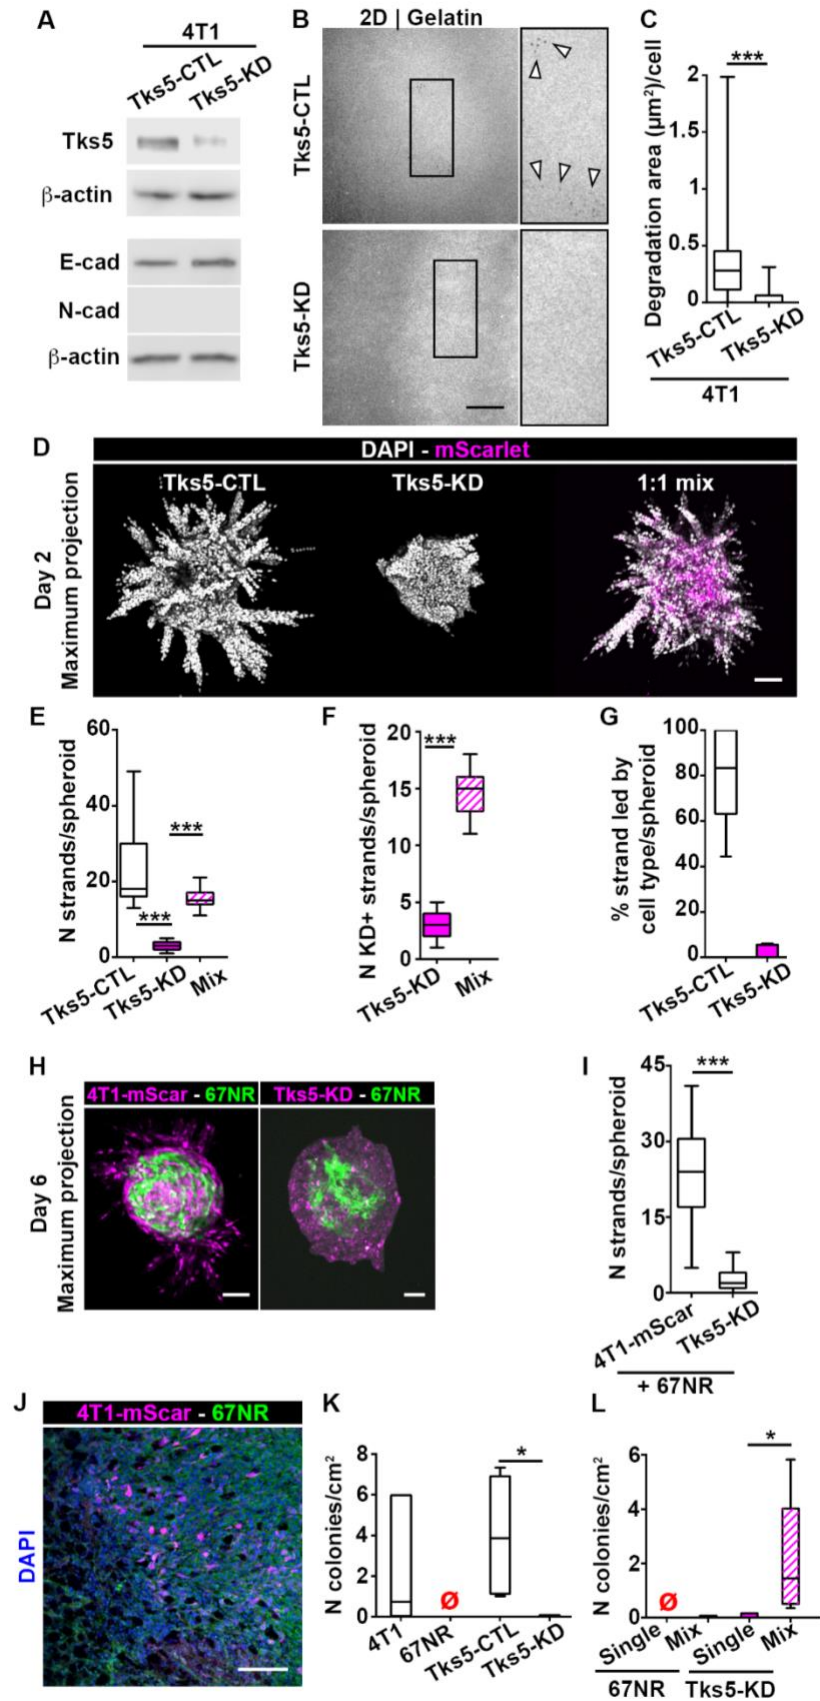

1092  
1093

1094 **Fig. 6 Cells without invadopodia can invade and metastasize via cooperation with cells that**  
1095 **assemble invadopodia.**

1096 (A) Tks5 (top), and E/N-cadherin (bottom) expression in Tks5-CTL and Tks5-KD cells. (B) Gelatin  
1097 degradation by Tks5-CTL (top panel) and Tks5-KD (bottom panel), 18 h after plating. The inserts  
1098 show a 2X zoom-in of the boxed area and arrowheads indicate representative degradation. Scale  
1099 bar: 20  $\mu\text{m}$ . (C) Degradation area per cell for Tks5-CTL and Tks5-KD cells from (B).  $P < 2.2 \times 10^{-16}$ ,  
1100 by the Wilcoxon rank sum test. (D) Day 2 images of spheroids made of Tks5-CTL, -KD or a mixture  
1101 of Tks5-CTL and -KD (1:1 ratio) cells. Scale bar: 100  $\mu\text{m}$ . (E-G) Number of strands per spheroid  
1102 (E), number of strands containing Tks5-KD cells (F), and percentage of strands led by Tks5-CTL  
1103 and -KD cells (G) in spheroids from (D).  $P = 1.54 \times 10^{-7}$  and  $2.89 \times 10^{-5}$ , by the Wilcoxon rank sum  
1104 test in (E).  $P = 6.69 \times 10^{-11}$ , by the t-test in (F). (H) Day 6 images of mixed spheroids (1:50 ratio)  
1105 made of 67NR-GFP and 4T1-mScarlet (4T1-mScar) or Tks5-KD cells. Scale bars: 100  $\mu\text{m}$ . (I)  
1106 Number of strands per spheroid from (H).  $P = 3.36 \times 10^{-6}$ , by the Wilcoxon rank sum test. (J) Mixed  
1107 4T1-mScarlet and 67NR-GFP tumor, labeled with DAPI (blue). Scale bar: 50  $\mu\text{m}$ . (K) Number of  
1108 lung colonies per  $\text{cm}^2$  for mice inoculated with 4T1, 67NR, Tks5-CTL or Tks5-KD cells. The red  
1109 empty symbols indicate zero values.  $P = 0.032$ , by the Wilcoxon rank sum test. (L) Number of lung  
1110 colonies per  $\text{cm}^2$  for mice inoculated with single 67NR cells, or mixed with 4T1 cells; and single  
1111 Tks5-KD cells, or mixed with Tks5-CTL cells. The red empty symbols indicate zero values.  
1112  $P = 0.032$ , by the Wilcoxon rank sum test.
